# Supplementary material
Source: Royal Society of Chemistry journal article supplement (doi:10.1039/d6ob00362a)

## Supporting information

### Metal-Free, Iodine/DMSO-Promoted Oxidative C(sp<sup>2</sup>)-H Difunctionalization: Synthesis of Aminochalcogenylated indoles

Satyajit Pal<sup>a</sup>, Subhankar Sarkar<sup>a</sup>, Tanmay Pramanik<sup>a</sup>, Anindita Mukherjee<sup>b</sup>, Sougata Santra<sup>b</sup>,  
Grigory V. Zyryanov<sup>b,c</sup> and Adinath Majee\*<sup>a</sup>

<sup>a</sup>Department of Chemistry, Visva-Bharati (A Central University), Santiniketan-731235,  
India; E-mail: adinath.majee@visva-bharati.ac.in

<sup>b</sup>Department of Organic & Biomolecular Chemistry, Chemical Engineering Institute, Ural  
Federal University, 19 Mira Str., Yekaterinburg, 620002, Russian Federation

<sup>c</sup>I. Ya. Postovskiy Institute of Organic Synthesis, Ural Division of the Russian Academy of  
Sciences 22 S. Kovalevskoy Street, Yekaterinburg 620219, Russian Federation

## Contents

| Sl. No. | Topics                                                                                       | Page No. |
|---------|----------------------------------------------------------------------------------------------|----------|
| 1       | General information.                                                                         | S2       |
| 2       | General experimental procedure for the synthesis of <b>4aa-4aw</b> .                         | S2       |
| 3       | General procedure for the application                                                        | S3       |
| 4       | Characterization data of the synthesized compounds                                           | S3-S16   |
| 5       | References.                                                                                  | S16      |
| 6       | NMR spectra [ <sup>1</sup> H, and <sup>13</sup> C{ <sup>1</sup> H}] of synthesized products. | S18      |

## 1. Experimental Section

### General Information

$^1\text{H}$  NMR spectra were determined on a Bruker 400 (400 MHz) spectrometer as solutions in  $\text{CDCl}_3$ . Chemical shifts are expressed in parts per million ( $\delta$ ) and the signals were reported as s (singlet), d (doublet), t (triplet), m (multiplet), and coupling constants  $J$  were given in Hz.  $^{13}\text{C}\{^1\text{H}\}$  NMR spectra were recorded at 100 MHz in  $\text{CDCl}_3$  solution. Chemical shifts are expressed in parts per million ( $\delta$ ) and are referenced to  $\text{CDCl}_3$  ( $\delta = 77.16$ ) as an internal standard. TLC was done on a silica gel-coated glass slide (Merck, Silica gel G for TLC). Silica gel (60-120 mesh, SRL, India) was used for column chromatography. Petroleum ether refers to the fraction boiling in the range of 60-80 °C unless otherwise mentioned. All solvents were dried and distilled before use. Commercially available substrates were freshly distilled before the reaction. Solvents, reagents, and chemicals were purchased from Aldrich, Merck, and Spectrochem Chemicals. All reactions involving moisture-sensitive reactants were executed using oven-dried glassware. All the *NH*-sulfoximines<sup>1</sup> were prepared according to the reported method. A borosilicate glass tube was used as a reaction tube.

### 2. Scheme 1. General experimental procedure for the synthesis of 4aa-4ay.

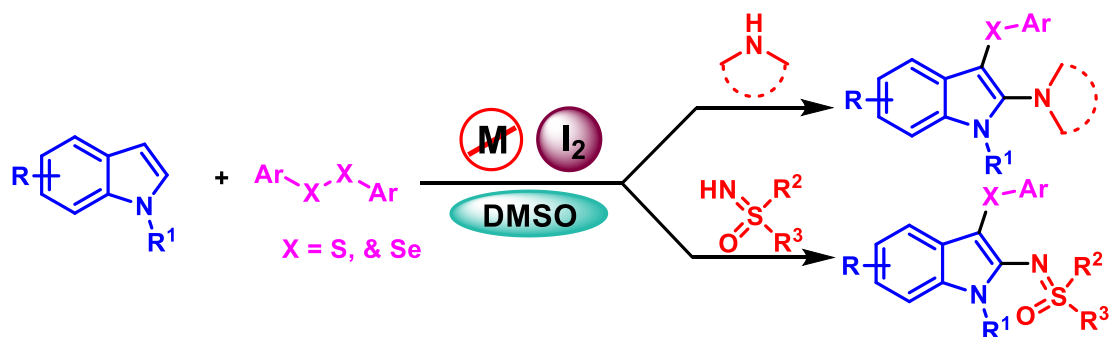

A mixture of indole (**1**, 1 mmol), amines (**2**, 1 mmol) and diaryl disulfide (**3**, 0.75 mmol) was stirred in the presence of 2 mL of DMSO as solvent and  $\text{I}_2$  catalyst (20 mol%) at 80 °C for 8 h. After the completion of the reaction, confirmed by TLC, the mixture was cooled to room temperature and then diluted with saturated saline water ( $3 \times 15$  mL), saturated sodium thiosulfate solution ( $2 \times 15$  mL) and extracted with ethyl acetate. The combined organic layer was collected and dried over anhydrous  $\text{Na}_2\text{SO}_4$ . The residue was purified by column chromatography on silica gel to afford the desired products (eluent: ethyl acetate/petroleum ether).

### 3. General procedure for the application (5)<sup>1</sup>:

A mixture of **4ay**, PhI(OAc)<sub>2</sub> (2.5 equiv) and AcONH<sub>4</sub> (2 equiv) was stirred in the presence of MeOH as solvent at room temperature. After the completion of the reaction, confirmed by TLC, the solvent is removed by rotary evaporator. Then, the mixture was cooled to room temperature and then diluted with saturated saline water (3×15 mL), saturated sodium thiosulfate solution (2×15 mL) and extracted with ethyl acetate. The combined organic layer was collected and dried over anhydrous Na<sub>2</sub>SO<sub>4</sub>. The residue was purified by column chromatography on silica gel to afford the desired products (eluent: DCM/MeOH).

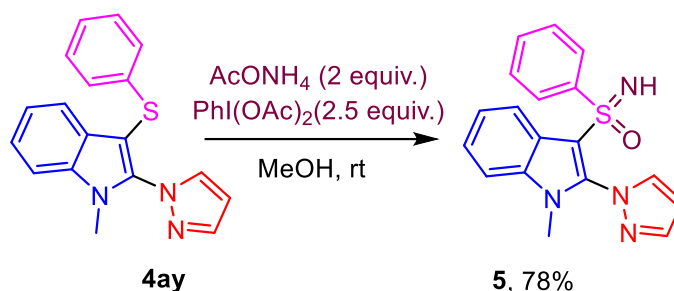

### 4. Characterization data of the synthesized compounds:

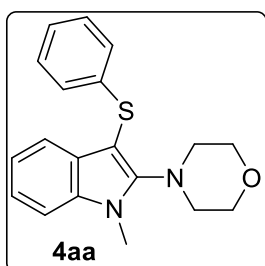

**4-(1-methyl-3-(phenylthio)-1H-indol-2-yl)morpholine (4aa)**<sup>2</sup>: Yield: 83%; 268 mg; yellowish white solid; m.p.: 121-122 °C; column chromatography done (eluent: ethyl acetate/petroleum ether = 1/14); <sup>1</sup>H NMR (CDCl<sub>3</sub>, 400 MHz): δ 7.62 (d, *J*=7.6 Hz, 1H), 7.34-7.32 (m, 2H), 7.26-7.20 (m, 3H), 7.15-7.11 (m, 3H), 3.90- 3.88 (m, 4H), 3.80 (s, 3H), 3.42- 3.40 (m, 4H); <sup>13</sup>C {<sup>1</sup>H} NMR (CDCl<sub>3</sub>, 100 MHz): δ 150.7, 140.4, 134.8, 129.6, 128.8, 125.2, 124.5, 122.2, 120.8, 118.7, 109.5, 90.9, 67.7, 51.6, 29.1.

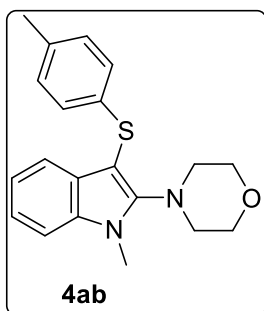

**4-(1-methyl-3-(p-tolylthio)-1H-indol-2-yl)morpholine (4ab)**: Yield: 80%, 270 mg; white solid; m.p.: 127-129 °C; column chromatography done (eluent: ethyl acetate/petroleum ether = 1/10);  $^1\text{H}$  NMR ( $\text{CDCl}_3$ , 400 MHz):  $\delta$  7.54 (d,  $J=7.6$  Hz, 1H), 7.30-7.22 (m, 2H), 7.15-7.11 (m, 1H), 6.99-6.95 (m, 4H), 3.82-3.80 (m, 4H), 3.71 (s, 3H), 3.33- 3.31 (m, 4H), 2.26 (s, 3H);  $^{13}\text{C}\{^1\text{H}\}$  NMR ( $\text{CDCl}_3$ , 100 MHz):  $\delta$  150.6, 136.8, 134.8, 134.2, 129.7, 129.6, 125.3, 122.1, 120.7, 118.8, 109.5, 91.4, 67.7, 51.6, 29.1, 20.9. HRMS (ESI-TOF) m/z:  $[\text{M}+\text{H}]^+$  Calculated for  $[\text{C}_{20}\text{H}_{23}\text{N}_2\text{OS}]^+$  : 339.1526; Found : 339.1532.

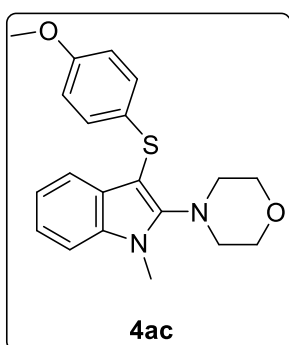

**4-(3-((4-methoxyphenyl)thio)-1-methyl-1H-indol-2-yl)morpholine (4ac)**: Yield: 80%, 270 mg; yellowish white solid; m.p.: 158-160 °C; column chromatography done (eluent: ethyl acetate/petroleum ether = 1/8);  $^1\text{H}$  NMR ( $\text{CDCl}_3$ , 400 MHz):  $\delta$  7.60 (d,  $J=7.6$  Hz, 1H), 7.31-7.25 (m, 2H), 7.18-7.14 (m, 1H), 7.06-7.04 (m, 2H), 6.77-6.75 (m, 2H), 3.84-3.82 (m, 4H), 3.74 (s, 3H), 3.71 (s, 3H), 3.35- 3.33 (m, 4H);  $^{13}\text{C}\{^1\text{H}\}$  NMR ( $\text{CDCl}_3$ , 100 MHz):  $\delta$  156.4, 149.4, 133.7, 130.1, 128.7, 126.1, 121.0, 119.6, 117.7, 113.6, 108.4, 91.2, 66.6, 54.4, 50.6, 28.0. HRMS (ESI-TOF) m/z:  $[\text{M}+\text{H}]^+$  Calculated for  $[\text{C}_{20}\text{H}_{23}\text{N}_2\text{O}_2\text{S}]^+$  : 355.1475; Found : 355.1482.

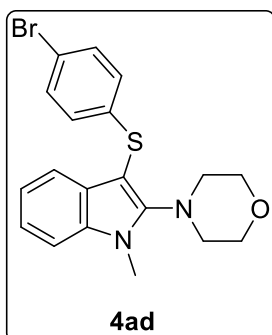

**4-(3-((4-bromophenyl)thio)-1-methyl-1H-indol-2-yl)morpholine (4ad):** Yield: 79%, 317 mg; white solid; m.p.: 166-168 °C; column chromatography done (eluent: ethyl acetate/petroleum ether = 1/8);  $^1\text{H}$  NMR ( $\text{CDCl}_3$ , 400 MHz):  $\delta$  7.46 (d,  $J=7.6$  Hz, 1H), 7.28-7.21 (m, 4H), 7.13-7.09 (m, 1H), 6.89-6.86 (m, 2H), 3.78-3.76 (m, 4H), 3.67 (s, 3H), 3.27- 3.25 (m, 4H);  $^{13}\text{C}$   $\{^1\text{H}\}$  NMR ( $\text{CDCl}_3$ , 100 MHz):  $\delta$  150.8, 139.8, 134.9, 131.8, 129.4, 126.7, 122.3, 121.0, 118.5, 118.0, 109.6, 90.2, 67.6, 51.6, 29.2. HRMS (ESI-TOF)  $m/z$ :  $[\text{M}+\text{H}]^+$  Calculated for  $[\text{C}_{19}\text{H}_{20}\text{BrN}_2\text{OS}]^+$  : 403.0474; Found : 403.0488.

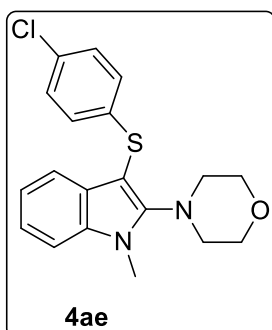

**4-(3-((4-chlorophenyl)thio)-1-methyl-1H-indol-2-yl)morpholine (4ae):** Yield: 80%, 286 mg; yellowish white solid; m.p.: 138-140 °C; column chromatography done (eluent: ethyl acetate/petroleum ether = 1/8);  $^1\text{H}$  NMR ( $\text{CDCl}_3$ , 400 MHz):  $\delta$  7.50 (d,  $J=7.6$  Hz, 1H), 7.31-7.24 (m, 2H), 7.16-7.10 (m, 3H), 6.98-6.96 (m, 2H), 3.82-3.80 (m, 4H), 3.71 (s, 3H), 3.31- 3.19 (m, 4H);  $^{13}\text{C}$   $\{^1\text{H}\}$  NMR ( $\text{CDCl}_3$ , 100 MHz):  $\delta$  150.8, 139.1, 134.8, 130.2, 129.4, 128.9, 126.4, 122.3, 120.9, 118.6, 109.6, 90.4, 67.6, 51.6, 29.2. HRMS (ESI-TOF)  $m/z$ :  $[\text{M}+\text{H}]^+$  Calculated for  $[\text{C}_{19}\text{H}_{20}\text{ClN}_2\text{OS}]^+$  : 359.0979; Found : 359.0981.

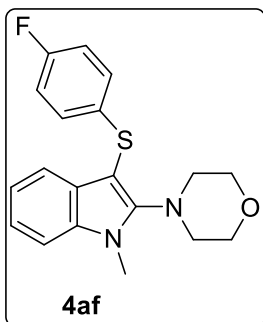

**4-(3-((4-fluorophenyl)thio)-1-methyl-1H-indol-2-yl)morpholine (4af):** Yield: 82%, 280 mg; brown solid; m.p.: 117-119 °C; column chromatography done (eluent: ethyl acetate/petroleum ether = 1/12); <sup>1</sup>H NMR (CDCl<sub>3</sub>, 400 MHz): δ 7.45 (d, *J*=7.6 Hz, 1H), 7.22-7.15 (m, 2H), 7.05-7.05 (m, 1H), 6.95-6.92 (m, 2H), 6.80-6.76 (m, 2H), 3.74-3.72 (m, 4H), 3.62 (s, 3H), 3.22 (m, 4H); <sup>13</sup>C {<sup>1</sup>H} NMR (CDCl<sub>3</sub>, 100 MHz): δ 160.7 (d, *J*=241Hz), , 159.5, 150.6, 135.4, 134.8, 129.5, 126.8 (d, *J*=7 Hz), , 122.2, 120.8, 118.5, 115.8 (d, *J*=22 Hz), , 109.6, 91.2, 67.6, 51.5, 29.1. HRMS (ESI-TOF) m/z: [M+H]<sup>+</sup> Calculated for [C<sub>19</sub>H<sub>20</sub>FN<sub>2</sub>OS]<sup>+</sup> : 343.1275; Found : 343.1283.

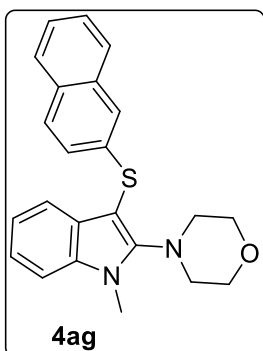

**4-(1-methyl-3-(naphthalen-2-ylthio)-1H-indol-2-yl)morpholine (4ag):** Yield: 76%, 284 mg; brown solid; m.p.: 96-98 °C; column chromatography done (eluent: ethyl acetate/petroleum ether = 1/12); <sup>1</sup>H NMR (CDCl<sub>3</sub>, 400 MHz): δ 7.63 (d, *J*=7.6 Hz, 1H), 7.55 (d, *J*=8.4 Hz, 1H), 7.47 (d, *J*=7.6 Hz, 2H), 7.32 (s, 1H), 7.29-7.22 (m, 3H), 7.19-7.14 (m, 2H), 7.06-7.02 (m, 1H), 3.70-3.68 (m, 4H), 3.64 (s, 3H), 3.26-3.24 (m, 4H); <sup>13</sup>C {<sup>1</sup>H} NMR (CDCl<sub>3</sub>, 100 MHz): δ 150.9, 138.1, 134.9, 133.9, 131.3, 129.8, 129.4, 128.4, 127.8, 126.9, 126.4, 125.0, 124.3, 122.5, 122.2,

120.9, 118.8, 109.6, 67.6, 51.6, 29.2. HRMS (ESI-TOF)  $m/z$ :  $[M+H]^+$  Calculated for  $[C_{23}H_{23}N_2OS]^+$  : 375.1526; Found : 375.1526.

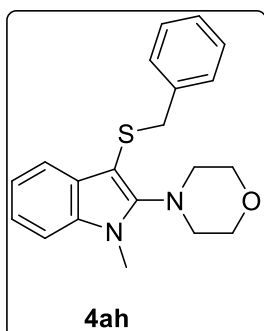

**4-(3-(benzylthio)-1-methyl-1H-indol-2-yl)morpholine (4ah)**: Yield: 79%, 267 mg; brown solid; m.p.: 128-130 °C; column chromatography done (eluent: ethyl acetate/petroleum ether = 1/12);  $^1H$  NMR ( $CDCl_3$ , 400 MHz):  $\delta$  7.65 (d,  $J=7.6$  Hz, 1H), 7.25-7.21 (m, 3H), 7.20-7.18 (m, 2H), 7.17-7.15 (m, 1H), 7.03-7.01 (m, 2H), 3.85 (s, 2H), 3.71-3.69 (m, 4H), 3.58 (m, 3H), 2.97 (s, 4H);  $^{13}C\{^1H\}$  NMR ( $CDCl_3$ , 100 MHz):  $\delta$  150.6, 138.9, 134.8, 132.6, 129.2, 128.3, 126.7, 121.8, 120.3, 118.5, 109.5, 93.5, 67.7, 51.9, 41.1, 28.9. HRMS (ESI-TOF)  $m/z$ :  $[M+H]^+$  Calculated for  $[C_{20}H_{23}N_2OS]^+$  : 339.1526; Found : 339.1537.

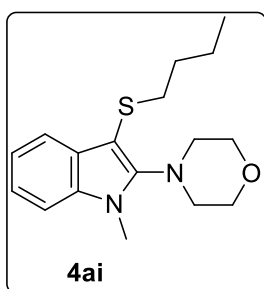

**4-(3-(butylthio)-1-methyl-1H-indol-2-yl)morpholine (4ai)**: Yield: 77%, 234 mg; colourless oil; column chromatography done (eluent: ethyl acetate/petroleum ether = 1/15);  $^1H$  NMR ( $CDCl_3$ , 400 MHz):  $\delta$  7.71 (d,  $J=7.6$  Hz, 1H), 7.25-7.23 (m, 2H), 7.21-7.19 (m, 1H), 3.89-3.87 (m, 4H), 3.65 (s, 3H), 3.42-4.40 (m, 4H), 2.7-2.69 (m, 2H), 1.64-1.57 (m, 2H), 1.49-1.40 (m, 2H), 0.92 (t,  $J=7.6$ , 3H);  $^{13}C\{^1H\}$  NMR ( $CDCl_3$ , 100 MHz):  $\delta$  149.6, 134.5, 129.9, 121.7, 120.1, 118.7,

109.3, 95.4, 67.7, 52.1, 37.4, 32.1, 28.8, 22.1, 13.8. HRMS (ESI-TOF)  $m/z$ :  $[M+H]^+$  Calculated for  $[C_{17}H_{25}N_2OS]^+$  : 305.1682; Found : 305.1693.

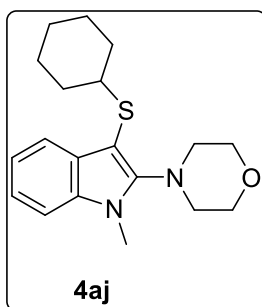

**4-(3-(cyclohexylthio)-1-methyl-1H-indol-2-yl)morpholine (4aj)**: Yield: 76%; 250 mg; colourless oil; column chromatography done (eluent: ethyl acetate/petroleum ether = 1/15);  $^1H$  NMR ( $CDCl_3$ , 400 MHz):  $\delta$  7.70 (d,  $J=7.6$  Hz, 1H), 7.23-7.17 (m, 3H), 3.88-3.86 (m, 4H), 3.65 (s, 3H), 3.41-4.39 (m, 4H), 2.87-2.79 (m, 1H), 1.98-1.93 (m, 2H), 1.79-1.74 (m, 2H), 1.63-1.58 (m, 1H), 1.45-1.35 (m, 2H), 1.28-1.19 (m, 3H);  $^{13}C\{^1H\}$  NMR ( $CDCl_3$ , 100 MHz):  $\delta$  149.9, 134.5, 130.6, 121.7, 120.1, 119.1, 109.2, 94.0, 67.8, 52.3, 48.8, 33.9, 29.0, 26.4, 25.9. HRMS (ESI-TOF)  $m/z$ :  $[M+H]^+$  Calculated for  $[C_{19}H_{27}N_2OS]^+$  : 331.1839; Found : 331.1856.

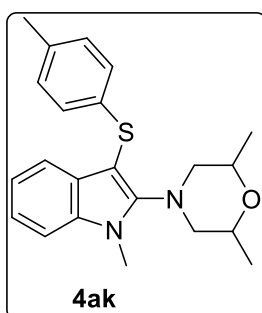

**2,6-dimethyl-4-(1-methyl-3-(p-tolylthio)-1H-indol-2-yl)morpholine (4ak)**: Yield: 78%, 285 mg; yellow gummy mass; column chromatography done (eluent: ethyl acetate/petroleum ether = 1/8);  $^1H$  NMR ( $CDCl_3$ , 400 MHz):  $\delta$  7.54 (d,  $J=8$  Hz, 1H), 7.30-7.23 (m, 2H), 7.16-7.12 (m, 1H), 6.99 (s, 6H), 3.85-3.82 (m, 4H), 3.69 (s, 3H), 3.27-3.21 (m, 2H), 3.00-2.97 (m, 2H), 2.27 (s, 3H), 1.20 (s, 3H), 1.18 (s, 3H);  $^{13}C\{^1H\}$  NMR ( $CDCl_3$ , 100 MHz):  $\delta$  150.4, 136.7, 134.7,

134.1, 129.5, 121.9, 120.6, 118.7, 109.4, 91.2, 72.6, 56.9, 29.2, 20.9, 18.9. HRMS (ESI-TOF) m/z:  $[M+H]^+$  Calculated for  $[C_{22}H_{27}N_2OS]^+$  : 367.1839; Found : 367.1851.

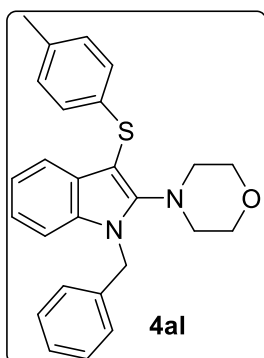

**4-(1-benzyl-3-(p-tolylthio)-1H-indol-2-yl)morpholine (4al)**: Yield: 78 %; 298 mg; yellowish white solid; m.p.: 132-134 °C; column chromatography done (eluent: ethyl acetate/petroleum ether = 1/10);  $^1H$  NMR ( $CDCl_3$ , 400 MHz):  $\delta$  7.32-7.29 (m, 2H), 7.25-7.22 (m, 1H), 7.20-7.16 (m, 2H), 7.14-7.08 (m, 4H), 6.98-6.95 (m, 3H), 5.40 (s, 2H), 3.67-3.65 (m, 4H), 3.20 (s, 4H), 2.25 (s, 3H);  $^{13}C\{^1H\}$  NMR ( $CDCl_3$ , 100 MHz):  $\delta$  150.7, 138.1, 136.4, 134.6, 134.3, 129.7, 129.7, 128.9, 127.5, 126.3, 125.4, 122.6, 120.9, 119.0, 110.4, 93.5, 67.7, 51.8, 46.2, 21.0. HRMS (ESI-TOF) m/z:  $[M+H]^+$  Calculated for  $[C_{26}H_{27}N_2OS]^+$  : 415.1839; Found : 415.1851.

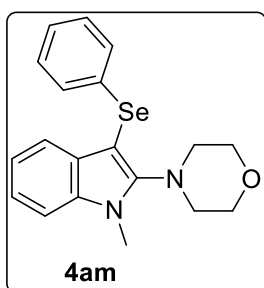

**4-(1-methyl-3-(phenylselanyl)-1H-indol-2-yl)morpholine (4am)<sup>2</sup>**: Yield: 78%; 290 mg; red liquid; column chromatography done (eluent: ethyl acetate/petroleum ether = 1/15);  $^1H$  NMR ( $CDCl_3$ , 400 MHz):  $\delta$  7.59 (d,  $J=7.6$  Hz, 1H), 7.32-7.26 (m, 2H), 7.22-7.18 (m, 2H), 7.16-7.10 (m, 4H), 3.84-3.82 (m, 4H), 3.74 (s, 3H), 3.34 (s, 4H);  $^{13}C\{^1H\}$  NMR ( $CDCl_3$ , 100 MHz):  $\delta$

150.5, 135.2, 135.0, 130.4, 129.0, 128.1, 125.4, 122.1, 120.6, 119.6, 109.4, 87.2, 67.7, 51.8, 29.0.

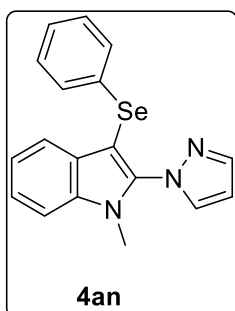

**1-methyl-3-(phenylselanyl)-2-(1H-pyrazol-1-yl)-1H-indole (4an)<sup>2</sup>**: Yield: 81 %; 285 mg; white solid; m.p.: 97-98 °C; column chromatography done (eluent: ethyl acetate/petroleum ether = 1/8); <sup>1</sup>H NMR (CDCl<sub>3</sub>, 400 MHz): δ 7.88 (d, *J*=1.6 Hz, 1H), 7.76 (d, *J*=8 Hz, 1H), 7.71 (d, *J*=2.4 Hz, 1H), 7.47-7.43 (m, 2H), 7.32-7.25 (m, 4H), 7.21-7.19 (m, 3H), 3.78 (s, 3H); <sup>13</sup>C{<sup>1</sup>H} NMR (CDCl<sub>3</sub>, 100 MHz): δ 142.3, 139.2, 135.7, 133.7, 133.4, 129.3, 128.9, 125.9, 124.2, 123.8, 121.5, 121.4, 121.2, 110.1, 106.7, 92.5, 30.7.

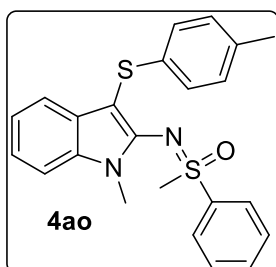

**methyl((1-methyl-3-(p-tolylthio)-1H-indol-2-yl)imino)(phenyl)-λ<sup>6</sup>-sulfanone (4ao)**: Yield: 81%; 328 mg; yellowish solid; m.p.: 129-131 °C; column chromatography done (eluent: ethyl acetate/petroleum ether = 1/5); <sup>1</sup>H NMR (CDCl<sub>3</sub>, 400 MHz): δ 8.43 (d, *J*=7.6 Hz, 1H), 7.93-7.89 (m, 1H), 7.83-7.79 (m, 4H), 7.64-7.61 (m, 2H), 7.56-7.52 (m, 2H), 7.47-7.43 (m, 2H), 4.16 (s, 3H), 3.56 (s, 3H), 2.58 (s, 3H); <sup>13</sup>C{<sup>1</sup>H} NMR (CDCl<sub>3</sub>, 100 MHz): δ 139.7, 136.2, 135.2, 133.9, 129.7, 129.4, 129.4, 128.3, 125.5, 121.1, 120.4, 118.5, 109.1, 45.0, 29.9, 21.0. HRMS (ESI-TOF) m/z: [M+H]<sup>+</sup> Calculated for [C<sub>23</sub>H<sub>23</sub>N<sub>2</sub>OS<sub>2</sub>]<sup>+</sup> : 407.1246; Found : 407.1259.

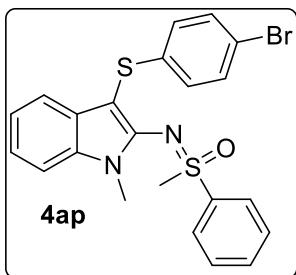

***((3-((4-bromophenyl)thio)-1-methyl-1H-indol-2-yl)imino)(methyl)(phenyl)-λ<sup>6</sup>-sulfanone***

**(4ap):** Yield: 76%; 357 mg; brown solid; m.p.: 150-152 °C column chromatography done (eluent: ethyl acetate/petroleum ether = 1/5); <sup>1</sup>H NMR (CDCl<sub>3</sub>, 400 MHz): δ 7.98-7.96 (m, 2H), 7.54-7.50 (m, 1H), 7.42-7.36 (m, 3H), 7.29-7.26 (m, 1H), 7.21-7.19 (m, 1H), 7.15-7.13 (m, 2H), 7.11-7.07 (m, 1H), 6.76-6.74 (m, 2H), 3.80 (s, 3H), 3.24 (s, 3H); <sup>13</sup>C{<sup>1</sup>H} NMR (CDCl<sub>3</sub>, 100 MHz): δ 139.5, 139.4, 135.1, 133.5, 131.5, 129.5, 129.3, 128.0, 126.7, 126.6, 121.2, 120.7, 118.1, 117.6, 109.1, 45.8, 29.8. HRMS (ESI-TOF) m/z: [M+H]<sup>+</sup> Calculated for [C<sub>22</sub>H<sub>20</sub>BrN<sub>2</sub>OS<sub>2</sub>]<sup>+</sup>: 471.0195; Found : 471.0201.

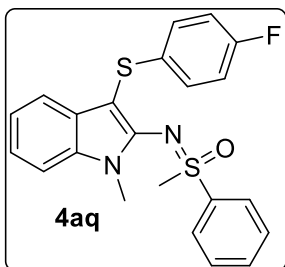

***((3-((4-fluorophenyl)thio)-1-methyl-1H-indol-2-yl)imino)(methyl)(phenyl)-λ<sup>6</sup>-sulfanone***

**(4aq):** Yield: 80%; 328 mg; brown solid; m.p.: 119-121 °C column chromatography done (eluent: ethyl acetate/petroleum ether = 1/5); <sup>1</sup>H NMR (CDCl<sub>3</sub>, 400 MHz): δ 8.02 (d, *J*=7.6 Hz, 2H), 7.56-7.52 (m, 1H), 7.45-7.41 (m, 3H), 7.28-7.26 (m, 1H), 7.21-7.17 (m, 1H), 7.12-7.08 (m, 1H), 6.90-6.87 (m, 2H), 6.80-6.75 (m, 2H), 3.80 (s, 3H), 3.25 (s, 3H); <sup>13</sup>C{<sup>1</sup>H} NMR (CDCl<sub>3</sub>, 100 MHz): δ 144.3, 139.6, 137.6, 135.2, 133.6, 130.4, 129.5, 129.4, 128.1, 127.6, 126.8

(d,  $J=5$  Hz), 121.3 (d,  $J=13$  Hz), 120.6, 118.2, 115.9, 115.6 (d,  $J=22$  Hz), 109.1, 45.6, 29.9.

HRMS (ESI-TOF)  $m/z$ :  $[M+H]^+$  Calculated for  $[C_{22}H_{20}FN_2OS_2]^+$  : 411.0996; Found : 411.1004.

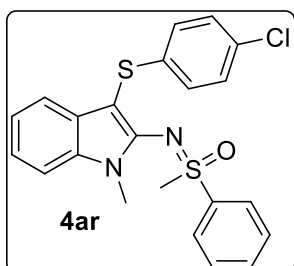

***((3-((4-chlorophenyl)thio)-1-methyl-1H-indol-2-yl)imino)(methyl)(phenyl)- $\lambda^6$ -sulfanone***

**(4ar)**: Yield: 81%; 345 mg; brown solid; m.p.: 132-134 °C; column chromatography done (eluent: ethyl acetate/petroleum ether = 1/5);  $^1H$  NMR ( $CDCl_3$ , 400 MHz):  $\delta$  7.98 (d,  $J=8$  Hz, 2H), 7.54-7.51 (m, 1H), 7.43-7.37 (m, 3H), 7.29-7.26 (m, 1H), 7.21-7.17 (m, 1H), 7.11-7.08 (m, 1H), 7.02-6.99 (m, 2H), 6.83-6.81 (m, 2H), 3.80 (s, 3H), 3.25 (s, 3H);  $^{13}C\{^1H\}$  NMR ( $CDCl_3$ , 100 MHz):  $\delta$  139.5, 135.2, 133.5, 129.9, 129.5, 129.3, 128.6, 128.0, 126.4, 122.5, 121.3, 121.2, 120.6, 118.2, 109.1, 108.2, 45.8, 29.8. HRMS (ESI-TOF)  $m/z$ :  $[M+H]^+$  Calculated for  $[C_{22}H_{20}ClN_2OS_2]^+$  : 427.0700; Found : 427.0709.

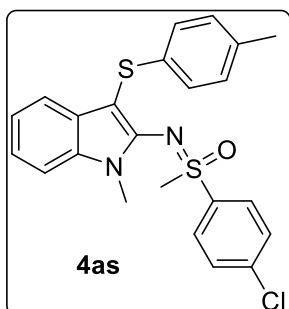

***(4-chlorophenyl)(methyl)((1-methyl-3-(p-tolylthio)-1H-indol-2-yl)imino)- $\lambda^6$ -sulfanone (4as)***

Yield: 77%; 338 mg; yellow solid; m.p.: 128-130 °C; column chromatography done (eluent: ethyl acetate/petroleum ether = 1/5);  $^1H$  NMR ( $CDCl_3$ , 400 MHz):  $\delta$  7.91 (d,  $J=8.4$  Hz, 2H), 7.41 (d,  $J=7.6$  Hz, 2H), 7.29-7.26 (m, 3H), 7.20-7.16 (m, 1H), 7.09-7.06 (m, 1H), 6.86 (d,  $J=7.6$ , 2H), 6.74 (d,  $J=8.4$ , 2H), 3.79 (s, 3H), 3.23 (s, 3H), 2.24 (s, 3H);  $^{13}C\{^1H\}$  NMR ( $CDCl_3$ ,

100 MHz):  $\delta$  140.2, 138.1, 136.2, 135.1, 133.9, 129.7, 129.6, 129.4, 125.0, 121.1, 120.5, 118.4, 109.0, 45.9, 29.8, 21.0. HRMS (ESI-TOF)  $m/z$ :  $[M+H]^+$  Calculated for  $[C_{23}H_{20}ClN_2OS_2]^+$  : 441.0857; Found : 441.0861.

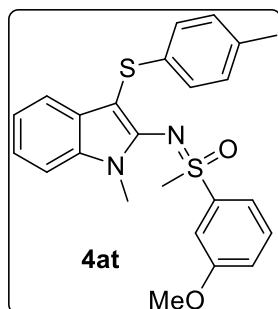

***(3-methoxyphenyl)(methyl)((1-methyl-3-(p-tolylthio)-1H-indol-2-yl)imino)- $\lambda^6$ -sulfanone***

**(4at):** Yield: 79%; 344 mg; red gummy mass; column chromatography done (eluent: ethyl acetate/petroleum ether = 1/5);  $^1H$  NMR ( $CDCl_3$ , 400 MHz):  $\delta$  7.64-7.62 (m, 2H), 7.47 (d,  $J=8$  Hz, 2H), 7.37-7.33 (m, 1H), 7.30-7.26 (m, 1H), 7.21-7.18 (m, 1H), 7.12-7.09 (m, 1H), 7.06-7.04 (m, 1H), 6.91-6.87 (m, 4H), 3.82 (s, 3H), 3.69 (s, 3H), 3.21 (s, 3H), 2.23 (s, 3H);  $^{13}C\{^1H\}$  NMR ( $CDCl_3$ , 100 MHz):  $\delta$  160.1, 144.3, 136.2, 135.1, 133.8, 130.4, 129.6, 129.4, 125.2, 121.0, 120.5, 120.4, 120.3, 118.4, 112.4, 109.0, 88.2, 55.5, 44.9, 29.8, 20.9. HRMS (ESI-TOF)  $m/z$ :  $[M+H]^+$  Calculated for  $[C_{24}H_{25}N_2O_2S_2]^+$  : 437.1352; Found : 437.1363.

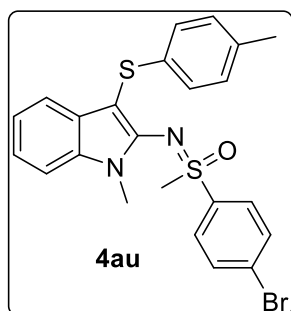

***(4-bromophenyl)(methyl)((1-methyl-3-(p-tolylthio)-1H-indol-2-yl)imino)- $\lambda^6$ -sulfanone***

**(4au):** Yield: 77%; 344 mg; brown solid; m.p.: 162-164 °C; column chromatography done (eluent: ethyl acetate/petroleum ether = 1/5);  $^1H$  NMR ( $CDCl_3$ , 400 MHz):  $\delta$  7.66 (d,  $J=7.6$  Hz,

2H), 7.29-7.26 (m, 3H), 7.28-7.25 (m, 3H), 7.11 (d,  $J=9.2$  Hz, 1H), 7.05-7.01 (m, 1H), 6.95-6.91 (m, 1H), 6.70 (d,  $J=8$  Hz, 2H), 6.56 (d,  $J=8$  Hz, 2H), 3.64 (s, 3H), 3.08 (s, 3H), 2.10 (s, 3H);  $^{13}\text{C}\{^1\text{H}\}$  NMR ( $\text{CDCl}_3$ , 100 MHz):  $\delta$  143.8, 138.5, 136.2, 135.1, 133.9, 132.5, 129.6, 129.4, 128.7, 125.2, 124.9, 121.1, 120.5, 118.4, 108.9, 87.0, 46.0, 29.8, 21.0. HRMS (ESI-TOF)  $m/z$ :  $[\text{M}+\text{H}]^+$  Calculated for  $[\text{C}_{23}\text{H}_{22}\text{BrN}_2\text{OS}_2]^+$  : 485.0351; Found : 485.0364.

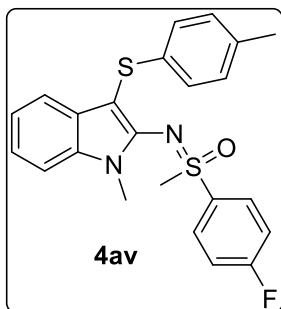

***(4-fluorophenyl)(methyl)((1-methyl-3-(p-tolylthio)-1H-indol-2-yl)imino)- $\lambda^6$ -sulfanone***

**(4av):** Yield: 75%; 331 mg; yellow solid; m.p.: 132-134 °C; column chromatography done (eluent: ethyl acetate/petroleum ether = 1/5);  $^1\text{H}$  NMR ( $\text{CDCl}_3$ , 400 MHz):  $\delta$  8.05-8.02 (m, 2H), 7.43 (d,  $J=8.4$  Hz, 1H), 7.29-7.26 (m, 1H), 7.21-7.17 (m, 1H), 7.11-7.02 (m, 3H), 6.89 (d,  $J=8$  Hz, 2H), 6.8 (d,  $J=8$  Hz, 2H), 3.79 (s, 3H), 3.22 (s, 3H), 2.23 (s, 3H);  $^{13}\text{C}\{^1\text{H}\}$  NMR ( $\text{CDCl}_3$ , 100 MHz):  $\delta$  164.5, 143.8, 135.6 (d,  $J=106$  Hz), 134.0, 131.2, 131.2, 129.6 (d,  $J=10$  Hz), 128.5, 125.2, 120.9 (d,  $J=67$  Hz), 118.5, 116.6 (d,  $J=23$  Hz), 109.1, 88.1, 45.5, 29.9, 20.9. HRMS (ESI-TOF)  $m/z$ :  $[\text{M}+\text{H}]^+$  Calculated for  $[\text{C}_{23}\text{H}_{22}\text{FN}_2\text{OS}_2]^+$  : 424.1079; Found : 424.1081.

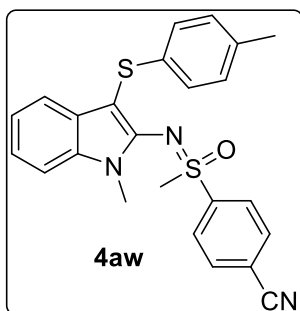

**4-(S-methyl-N-(1-methyl-3-(p-tolylthio)-1H-indol-2-yl)sulfonimidoyl)benzonitrile (4aw):**

Yield: 47%; 202 mg; brown solid; m.p.: 152-153 °C; column chromatography done (eluent: ethyl acetate/petroleum ether = 1/4);  $^1\text{H}$  NMR ( $\text{CDCl}_3$ , 400 MHz):  $\delta$  7.99 (d,  $J=7.6$  Hz, 2H), 7.46 (d,  $J=8$  Hz, 2H), 7.34 (d,  $J=8$  Hz, 1H), 7.27-7.26 (m, 1H), 7.20-7.16 (m, 1H), 7.08-7.04 (m, 1H), 6.81 (d,  $J=8.4$  Hz, 2H), 6.54(d,  $J=7.6$  Hz, 2H), 3.79 (s, 3H), 3.29 (s, 3H), 2.26 (s, 3H);  $^{13}\text{C}\{^1\text{H}\}$  NMR ( $\text{CDCl}_3$ , 100 MHz):  $\delta$  143.9, 132.9, 129.5, 129.3, 128.5, 124.6, 121.2, 120.6, 118.4, 117.3, 116.5, 108.9, 46.4, 29.7, 20.9. HRMS (ESI-TOF)  $m/z$ :  $[\text{M}+\text{H}]^+$  Calculated for  $[\text{C}_{23}\text{H}_{22}\text{BrN}_2\text{OS}_2]^+$  : 431.1126; Found : 431.1133.

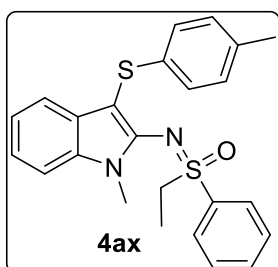

**ethyl((1-methyl-3-(p-tolylthio)-1H-indol-2-yl)imino)(phenyl)- $\lambda^6$ -sulfanone (4ax):** Yield: 76%; 319 mg; yellow solid; m.p.: 102-104 °C; column chromatography done (eluent: ethyl acetate/petroleum ether = 1/5);  $^1\text{H}$  NMR ( $\text{CDCl}_3$ , 400 MHz):  $\delta$  7.95 (d,  $J=7.6$  Hz, 2H), 7.50-7.47 (m, 1H), 7.41-7.36 (m, 3H), 7.26-7.24 (m, 1H), 7.17-7.14 (m, 1H), 7.08-7.04 (m, 1H), 6.87-6.80 (m, 4H), 3.80 (s, 3H), 3.41-3.36 (m, 2H), 2.22 (s, 3H), 1.21 (t,  $J=7.6$  Hz, 3H);  $^{13}\text{C}\{^1\text{H}\}$  NMR ( $\text{CDCl}_3$ , 100 MHz):  $\delta$  137.6, 136.5, 135.1, 133.7, 133.3, 129.8, 129.3, 129.3, 128.9, 125.4, 120.8, 120.3, 118.3, 108.8, 87.6, 52.0, 29.8, 21.0, 8.2. HRMS (ESI-TOF)  $m/z$ :  $[\text{M}+\text{H}]^+$  Calculated for  $[\text{C}_{24}\text{H}_{25}\text{N}_2\text{OS}_2]^+$  : 421.1403; Found : 421.1415.

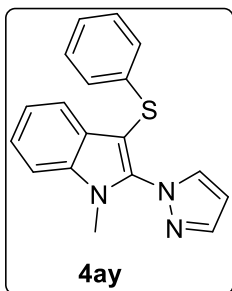

**1-methyl-3-(phenylthio)-2-(1H-pyrazol-1-yl)-1H-indole (4ay)<sup>2</sup>**: Yield: 78%; 337 mg; yellow solid; m.p.: 112-114 °C; column chromatography done (eluent: ethyl acetate/petroleum ether = 1/8); <sup>1</sup>H NMR (CDCl<sub>3</sub>, 400 MHz): δ 7.86 (d, *J*=1.6 Hz, 1H), 7.71-7.69 (m, 1H), 7.47-7.40 (m, 3H), 7.27-7.24 (m, 1H), 7.20-7.16 (m, 2H), 7.09-7.08 (m, 3H), 6.47-6.46 (m, 1H), 3.78 (s, 3H); <sup>13</sup>C{<sup>1</sup>H} NMR (CDCl<sub>3</sub>, 100 MHz): δ 142.4, 139.1, 138.6, 135.4, 133.6, 129.0, 128.2, 125.2, 123.9, 121.6, 120.3, 110.2, 106.9, 95.6, 30.8.

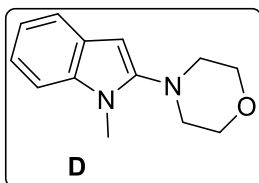

**4-(1-methyl-1H-indol-2-yl)morpholine (D)<sup>3</sup>**: Yield: 89%; 192 mg; white solid; mp: 101-102°C; column chromatography done (eluent: ethyl acetate/petroleum ether = 1/10); <sup>1</sup>H NMR (CDCl<sub>3</sub>, 400 MHz): δ 7.52 (d, *J*=7.6 Hz, 1H), 7.25 (d, *J*=8 Hz, 1H), 7.19-7.15 (m, 1H), 7.12-7.08 (m, 1H), 5.97 (s, 1H), 3.92-3.90 (m, 4H), 3.64 (s, 3H) 3.06-3.03 (m, 4H); <sup>13</sup>C{<sup>1</sup>H} NMR (CDCl<sub>3</sub>, 100 MHz): δ 150.1, 135.4, 127.6, 120.5, 119.7, 119.5, 108.8, 87.1, 67.0, 52.9, 29.2.

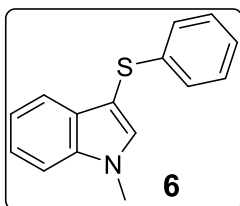

**1-methyl-3-(phenylthio)-1H-indole (6)**<sup>4</sup>: Yield: 21%; 50 mg; colourless oil; column chromatography done (eluent: ethyl acetate/petroleum ether = 1/25); <sup>1</sup>H NMR (CDCl<sub>3</sub>, 400 MHz): δ 7.62 (d, *J* = 8 Hz, 1H), 7.39 (d, *J* = 8.4 Hz, 1H), 7.34-7.29 (m, 2H), 7.19-7.14 (m, 3H), 7.11-7.09 (m, 2H), 7.07-7.04 (m, 1H), 3.86 (s, 3H); <sup>13</sup>C {<sup>1</sup>H} NMR (CDCl<sub>3</sub>, 100 MHz): δ 139.8, 137.6, 135.2, 129.9, 128.8, 125.8, 124.8, 122.7, 120.6, 119.9, 109.9, 100.5, 33.3.

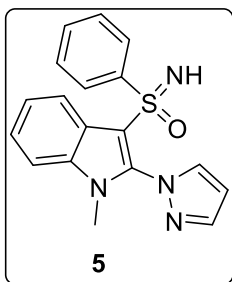

**imino(1-methyl-2-(1H-pyrazol-1-yl)-1H-indol-3-yl)(phenyl)-16-sulfanone (5)**: Yield: 78%; 262 mg; yellow gummy mass; column chromatography done (eluent: ethyl acetate/petroleum ether = 1/8); <sup>1</sup>H NMR (CDCl<sub>3</sub>, 400 MHz): δ 8.40-8.48 (m, 1H), 7.94-7.92 (m, 2H), 7.82 (d, *J* = 2.4 Hz, 1H), 7.43-7.33 (m, 6H), 6.57-6.56 (m, 1H), 3.43 (s, 3H), 2.62 (s, 1H); <sup>13</sup>C {<sup>1</sup>H} NMR (CDCl<sub>3</sub>, 100 MHz): δ 133.9, 142.6, 135.9, 135.2, 133.9, 132.4, 128.9, 127.2, 124.8, 123.6, 123.1, 121.5, 111.9, 110.3, 107.2, 29.9. Anal. Calcd. For C<sub>18</sub>H<sub>16</sub>N<sub>4</sub>OS: C, 64.27; H, 4.79; N, 16.65%; Found: C, 64.34; H, 4.89; N, 16.58%.

## 5. References:

1. A. Tota, M. Zenzola, S. J. Chawner, S. S. John-Campbell, C. Carlucci, G. Romanazzi, L. Degennaro, J. A. Bull and R. Luisi, *Chem. Commun. (Camb.)*, 2016, **53**, 348–351.
2. X. Zhang, C. Liu, Y. Zhang, F. Shen, W. Wei, Z. Zhang and T. Liang, *Org. Chem. Front.*, 2023, **10**, 5886–5894.
3. Y.-X. Li, K.-G. Ji, H.-X. Wang, S. Ali and Y.-M. Liang, *J. Org. Chem.*, 2011, **76**, 744–747.
4. P. Sharma and N. Jain, *J. Org. Chem.*, 2019, **84**, 13045–13052.

**6. NMR spectra [ $^1\text{H}$ , and  $^{13}\text{C}\{^1\text{H}\}$ ] of  
synthesized products:**

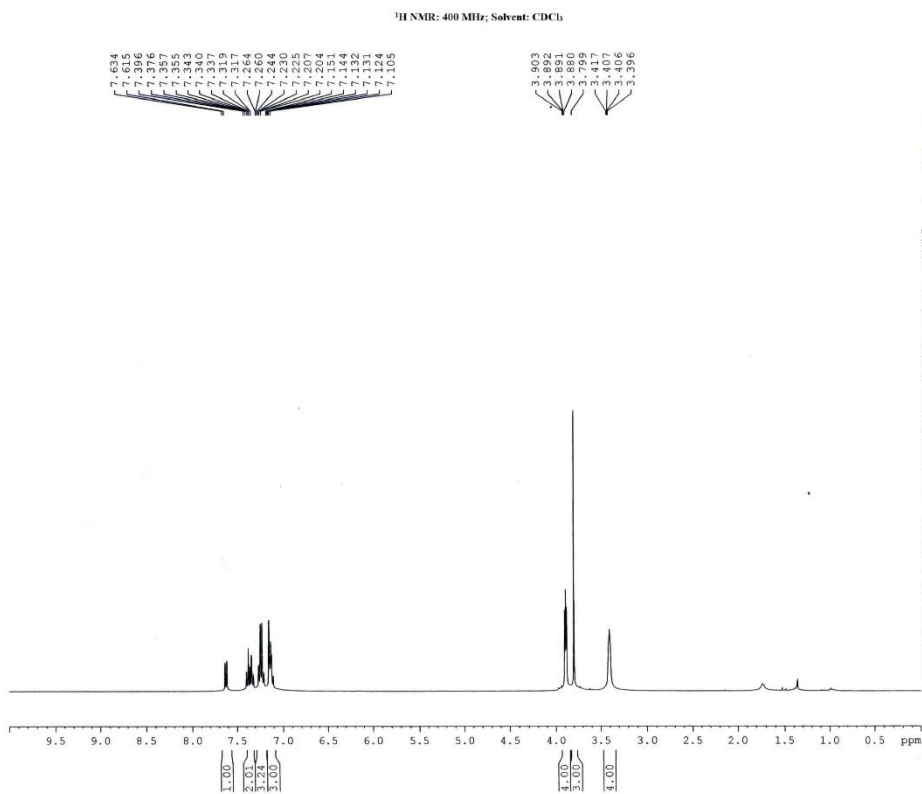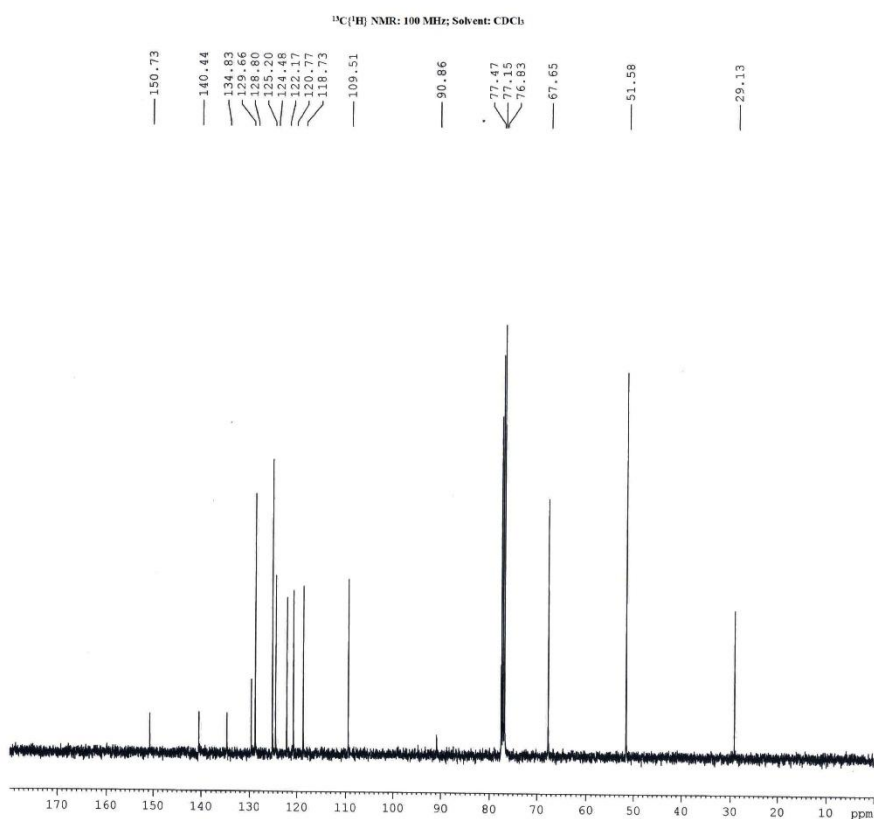

<sup>1</sup>H NMR: 400 MHz; Solvent: CDCl<sub>3</sub>

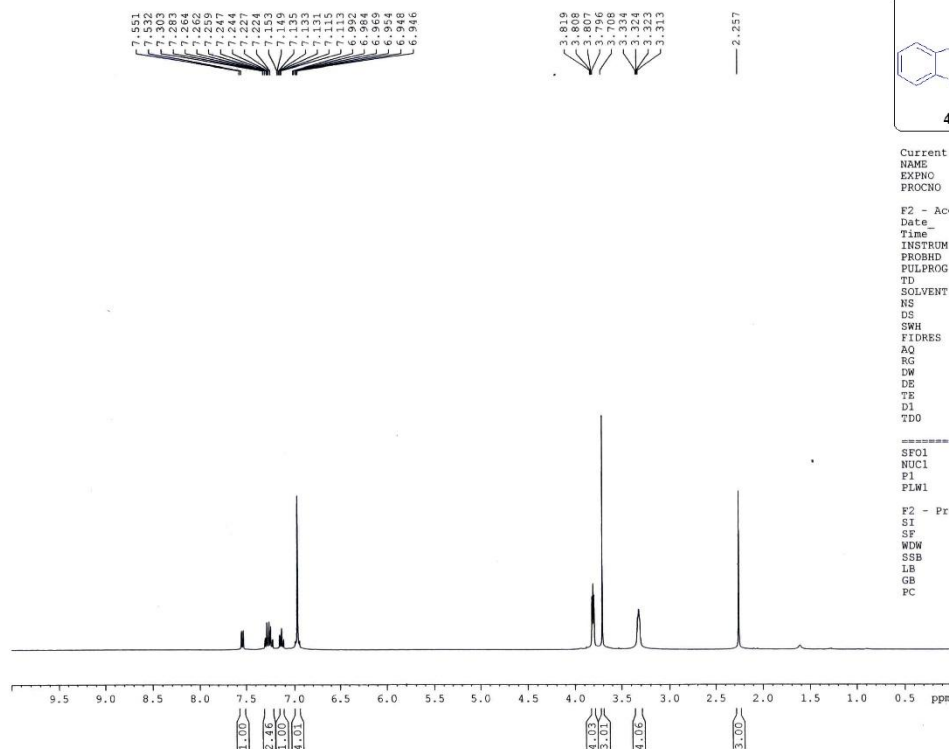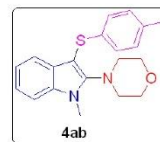

Current Data Parameters  
NAME Dr. A MAJEE 2023  
EXPNO 360  
PROCNO 1

F2 - Acquisition Parameters  
Date\_ 20230603  
Time\_ 12.51  
INSTRUM spect  
PROBHD 5 mm PABBO BB/  
PULPROG zg30  
TD 32768  
SOLVENT CDCl3  
NS 8  
DS 1  
SWH 8223.685 Hz  
FIDRES 0.250967 Hz  
AQ 1.992294 sec  
RG 87.66  
DW 60.800 usec  
DE 6.50 usec  
TE 299.0 K  
D1 1.00000000 sec  
TD0 1

==== CHANNEL f1 =====  
SF01 400.1524711 MHz  
NUC1 1H  
P1 14.75 usec  
PLW1 12.00000000 W

F2 - Processing parameters  
SI 16384  
SF 400.1500097 MHz  
WDW EM  
SSB 0  
LB 0.30 Hz  
GB 0  
PC 2.00

<sup>13</sup>C{<sup>1</sup>H} NMR: 100 MHz; Solvent: CDCl<sub>3</sub>

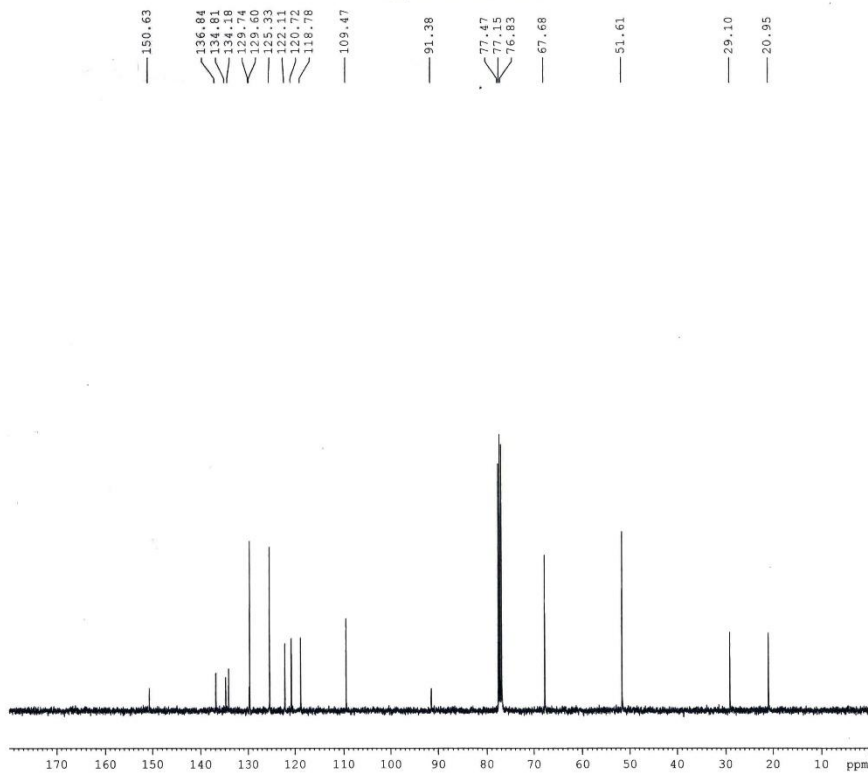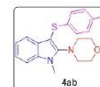

Current Data Parameters  
NAME Dr. A MAJEE 2023  
EXPNO 361  
PROCNO 1

F2 - Acquisition Parameters  
Date\_ 20230603  
Time\_ 13.08  
INSTRUM spect  
PROBHD 5 mm PABBO BB/  
PULPROG zgpg30  
TD 32768  
SOLVENT CDCl3  
NS 240  
DS 2  
SWH 24038.461 Hz  
FIDRES 0.733596 Hz  
AQ 0.6815744 sec  
RG 87.66  
DW 20.800 usec  
DE 6.50 usec  
TE 299.1 K  
D1 2.00000000 sec  
D11 0.03000000 sec  
TD0 1

==== CHANNEL f1 =====  
SF01 100.6278588 MHz  
NUC1 13C  
P1 8.90 usec  
PLW1 54.00000000 W

==== CHANNEL f2 =====  
SF02 400.1516006 MHz  
NUC2 1H  
CDEPRG2 waltz16  
PCPD2 90.00 usec  
PLW2 12.00000000 W  
PLW12 0.32231000 W  
PLW13 0.16212000 W

F2 - Processing parameters  
SI 16384  
SF 100.6179973 MHz  
WDW EM  
SSB 0  
LB 1.00 Hz  
GB 0  
PC 1.00



<sup>1</sup>H NMR: 400 MHz; Solvent: CDCl<sub>3</sub>

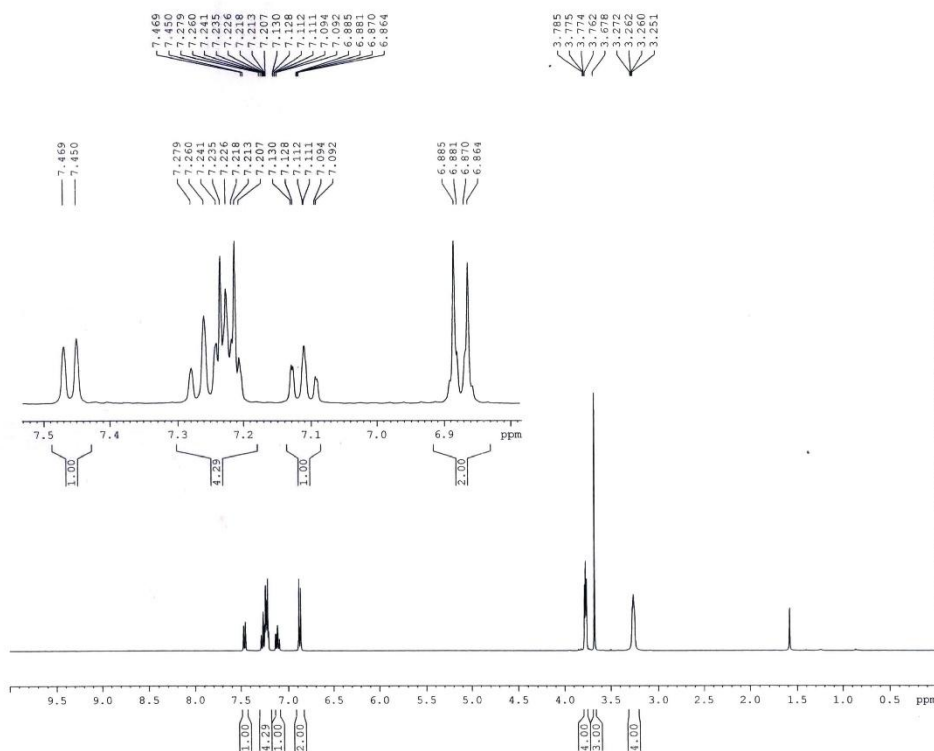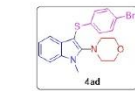

Current Data Parameters  
NAME Dr. A MAJEE 2023  
EXPNO 536  
PROCNO 1

F2 - Acquisition Parameters  
Date 20230727  
Time 13.28  
INSTRUM spect  
PROBHD 5 mm PABBO BB/  
PULPROG zg30  
TD 32768  
SOLVENT CDCl3  
NS 8  
DS 1  
SWH 8223.685 Hz  
FIDRES 0.250967 Hz  
AQ 1.922944 sec  
RG 67.81  
DW 60.800 usec  
DE 6.50 usec  
TE 296.8 K  
D1 1.00000000 sec  
TDO 1

----- CHANNEL f1 -----  
SFO1 400.1524711 MHz  
NUC1 1H  
P1 14.75 usec  
PLW1 12.00000000 W

F2 - Processing parameters  
SI 16384  
SF 400.1500228 MHz  
WDW EM  
SSB 0  
LB 0.30 Hz  
GB 0  
PC 2.00

<sup>13</sup>C{<sup>1</sup>H} NMR: 100 MHz; Solvent: CDCl<sub>3</sub>

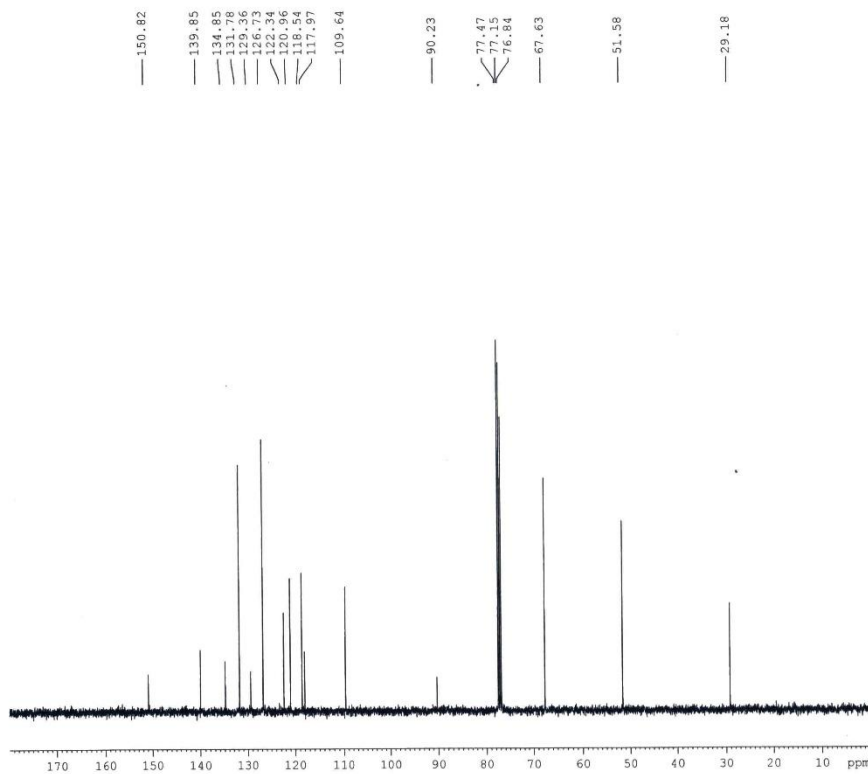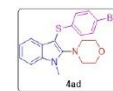

Current Data Parameters  
NAME Dr. A MAJEE 2023  
EXPNO 537  
PROCNO 1

F2 - Acquisition Parameters  
Date 20230727  
Time 13.39  
INSTRUM spect  
PROBHD 5 mm PABBO BB/  
PULPROG zg30  
TD 32768  
SOLVENT CDCl3  
NS 160  
DS 2  
SWH 24638.461 Hz  
FIDRES 0.733596 Hz  
AQ 0.6815744 sec  
RG 67.81  
DW 20.800 usec  
DE 6.50 usec  
TE 297.1 K  
D1 2.00000000 sec  
D11 0.03000000 sec  
TDO 1

----- CHANNEL f1 -----  
SFO1 100.6276588 MHz  
NUC1 13C  
P1 6.90 usec  
PLW1 54.00000000 W

----- CHANNEL f2 -----  
SFO2 400.1516006 MHz  
NUC2 1H  
CFDPRG12 waltz16  
PCFD2 90.00 usec  
PLW2 12.00000000 W  
PLW12 0.32210000 W  
PLW13 0.16212000 W

F2 - Processing parameters  
SI 16384  
SF 100.6177873 MHz  
WDW EM  
SSB 0  
LB 1.00 Hz  
GB 0  
PC 1.00



<sup>1</sup>H NMR: 400 MHz; Solvent: CDCl<sub>3</sub>

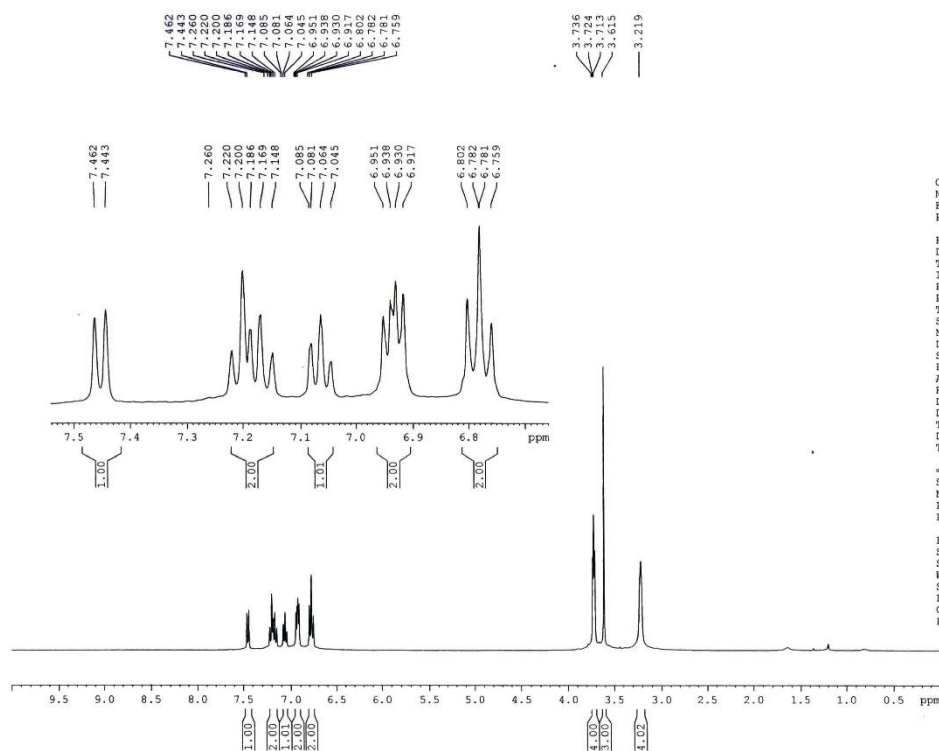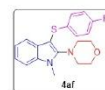

Current Data Parameters  
NAME Dr. A MAJEE 2023  
EXPNO 523  
PROCNO 1

F2 - Acquisition Parameters  
Date\_ 20230726  
Time 10.45  
INSTRUM spect  
PROBHD 5 mm PABBO BB/  
PULPROG zg30  
TD 32768  
SOLVENT CDCl3  
NS 8  
DS 1  
SWH 8223.685 Hz  
FIDRES 0.250967 Hz  
AQ 1.9922944 sec  
RG 26.53  
DW 60.800 usec  
DE 6.50 usec  
TE 294.0 K  
D1 1.0000000 sec  
TDC 1

----- CHANNEL f1 -----  
SFO1 400.1524711 MHz  
NUC1 1H  
P1 14.75 usec  
PLW1 12.00000000 W

F2 - Processing parameters  
SI 16384  
SF 400.1500348 MHz  
WDW EM  
SSB 0  
LB 0.30 Hz  
GB 0  
PC 2.00

<sup>13</sup>C{<sup>1</sup>H} NMR: 100 MHz; Solvent: CDCl<sub>3</sub>

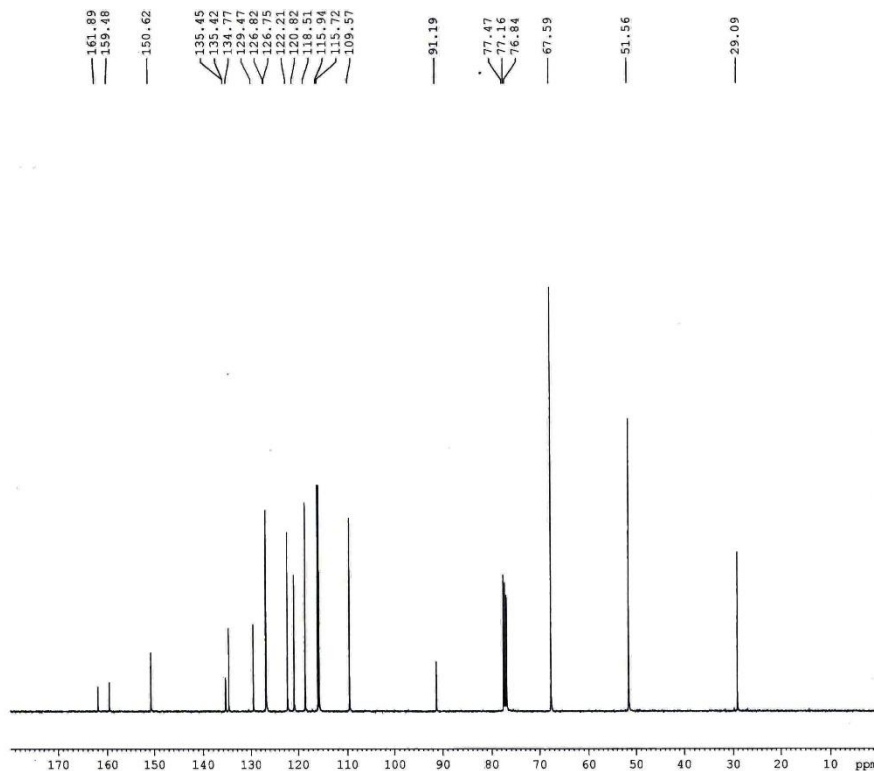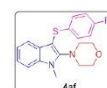

Current Data Parameters  
NAME Dr. A MAJEE 2023  
EXPNO 523  
PROCNO 1

F2 - Acquisition Parameters  
Date\_ 20230726  
Time 12.32  
INSTRUM spect  
PROBHD 5 mm PABBO BB/  
PULPROG zgpg30  
TD 32768  
SOLVENT CDCl3  
NS 1024  
DS 2  
SWH 24038.461 Hz  
FIDRES 0.733596 Hz  
AQ 0.6815744 sec  
RG 186.42  
DW 20.800 usec  
DE 6.50 usec  
TE 296.0 K  
D1 2.0000000 sec  
D11 0.03000000 sec  
TDO 0

----- CHANNEL f1 -----  
SFO1 100.6278588 MHz  
NUC1 13C  
P1 8.90 usec  
PLW1 54.00000000 W

----- CHANNEL f2 -----  
SFO2 400.1516006 MHz  
NUC2 1H  
CPCPRG[2] waltz16  
PCPD2 90.00 usec  
PLW2 12.00000000 W  
PLW12 0.3231000 W  
PLW13 0.16212000 W

F2 - Processing parameters  
SI 16384  
SF 100.6177961 MHz  
WDW EM  
SSB 0  
LB 1.00 Hz  
GB 0  
PC 1.00

<sup>1</sup>H of VBSP-283/12

<sup>1</sup>H NMR: 400 MHz; Solvent: CDCl<sub>3</sub>

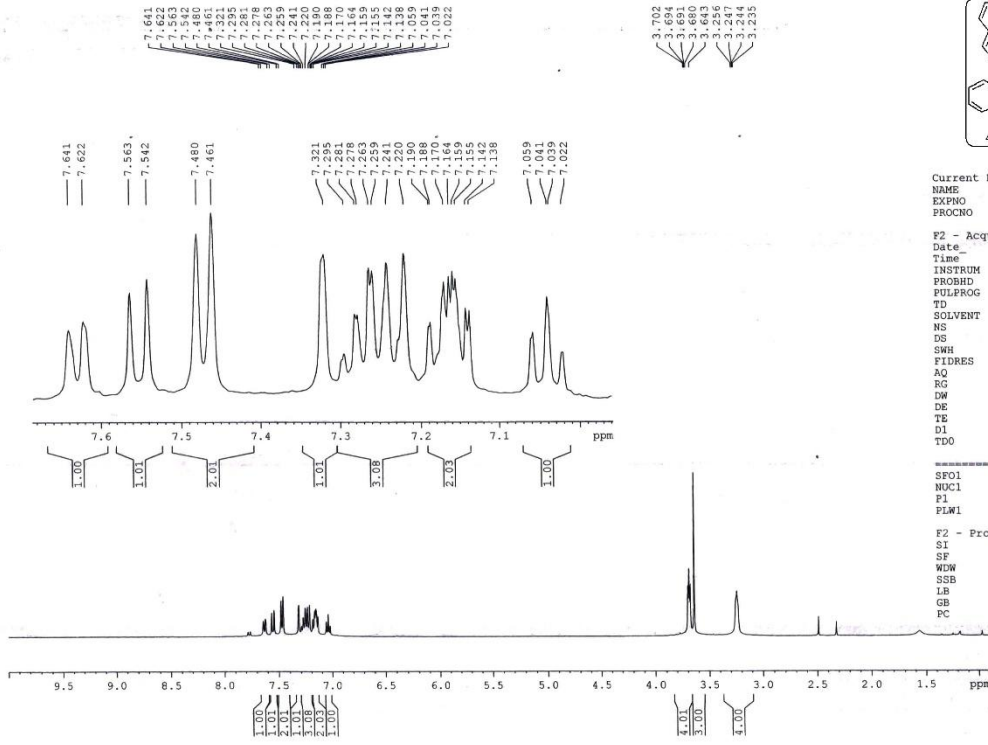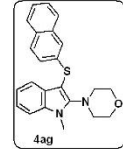

Current Data Parameters  
NAME Dr. A MAJEE 2023  
EXPNO 543  
PROCNO 1

F2 - Acquisition Parameters  
Date\_ 20230729  
Time 10.21  
INSTRUM spect  
PROBHD 5 mm PABBO BB/  
PULPROG zg30  
TD 32768  
SOLVENT CDCl3  
NS 8  
DS 1  
SWH 8223.685 Hz  
FIDRES 0.250867 Hz  
AQ 1.9922944 sec  
RG 106.66  
DW 60.800 use  
DE 6.50 use  
TE 299.4 K  
D1 1.0000000 sec  
TDO 1

CHANNEL f1  
SFO1 400.1524711 MHz  
NUC1 1H  
P1 14.75 use  
PLW1 12.0000000 W

F2 - Processing parameters  
SI 16384  
SF 400.1500514 MHz  
WDW EM  
SSB 0  
LB 0.30 Hz  
GB 0  
PC 2.00

<sup>13</sup>C{<sup>1</sup>H} NMR: 100 MHz; Solvent: CDCl<sub>3</sub>

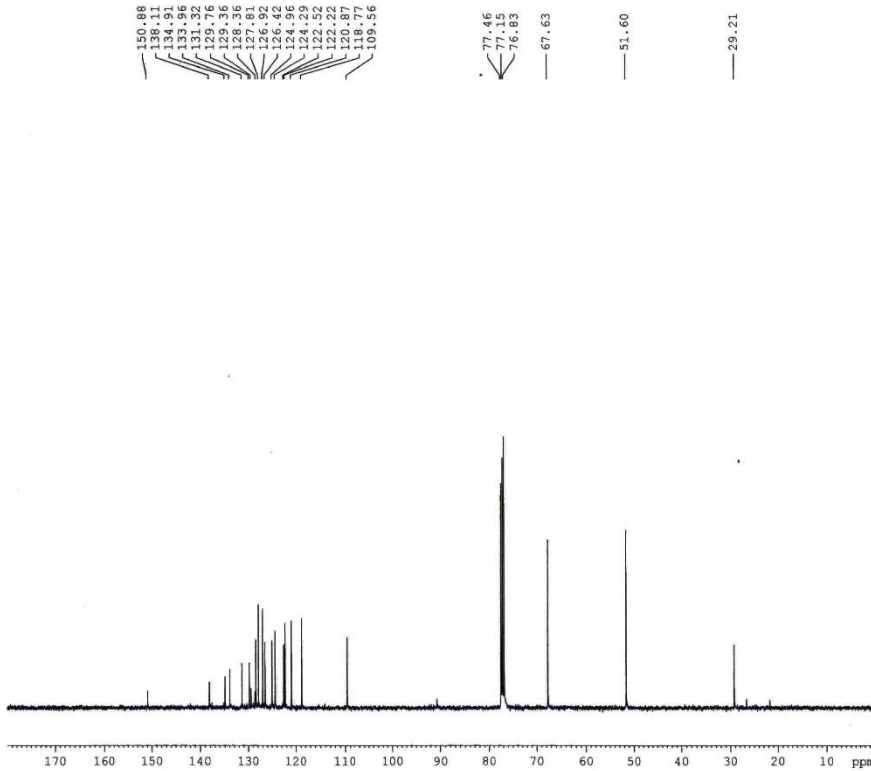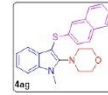

Current Data Parameters  
NAME Dr. A MAJEE 2023  
EXPNO 544  
PROCNO 1

F2 - Acquisition Parameters  
Date\_ 20230729  
Time 11.10  
INSTRUM spect  
PROBHD 5 mm PABBO BB/  
PULPROG zgpg30  
TD 32768  
SOLVENT CDCl3  
NS 720  
DS 2  
SWH 24038.461 Hz  
FIDRES 0.733596 Hz  
AQ 0.6915744 sec  
RG 196.66  
DW 20.800 use  
DE 6.50 use  
TE 299.6 K  
D1 2.0000000 sec  
D11 0.0300000 sec  
TDO 1

CHANNEL f1  
SFO1 100.6278568 MHz  
NUC1 13C  
P1 8.90 use  
PLW1 54.0000000 W

CHANNEL f2  
SFO2 400.1516006 MHz  
NUC2 1H  
CFPRG2 waltz16  
PCPD2 90.00 use  
PLW2 12.0000000 W  
PLW3 0.12231000 W  
PLW13 0.16212000 W

F2 - Processing parameters  
SI 16384  
SF 100.6177887 MHz  
WDW DM  
SSB 0  
LB 1.00 Hz  
GB 0  
PC 1.00

<sup>1</sup>H NMR: 400 MHz; Solvent: CDCl<sub>3</sub>

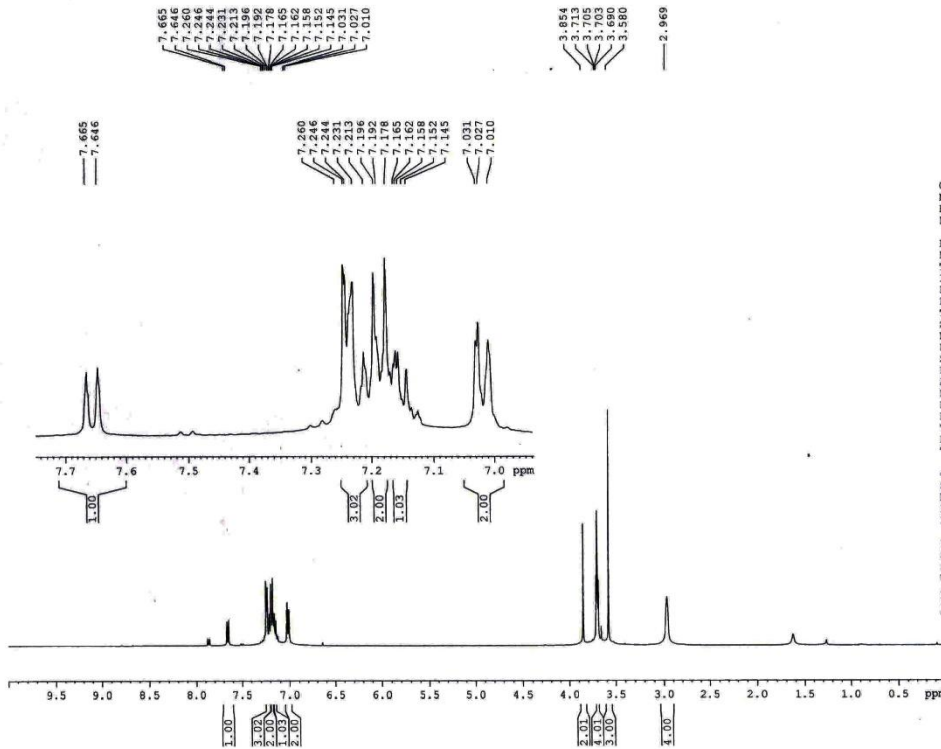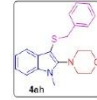

Current Data Parameters  
NAME Dr. A MAJER 2023  
EXPNO 534  
PROCNO 1

F2 - Acquisition Parameter  
Date 20230726  
Time 21.42  
INSTRUM spect  
PROBHD 5 mm PABBO BB/  
PULPROG zg30  
TD 32768  
SOLVENT CDCl<sub>3</sub>  
NS 8  
DS 1  
SWH 8223.685 Hz  
FIDRES 0.250967 Hz  
AQ 1.9922944 se  
RG 67.61  
DW 60.800 us  
DE 6.50 us  
TE 296.1 K  
SI 1.00000000 se  
TDO 1

CHANNEL f1  
SFO1 400.1524711 MH  
NUC1 1H  
PI 14.75 us  
PLW1 12.00000000 W

F2 - Processing parameters  
SI 16384  
SF 400.1500147 MH  
WDW EM  
SSB 0  
LB 0.30 Hz  
GB 0  
PC 2.00

<sup>13</sup>C of VBSP-283/3

<sup>13</sup>C{<sup>1</sup>H} NMR: 100 MHz; Solvent: CDCl<sub>3</sub>

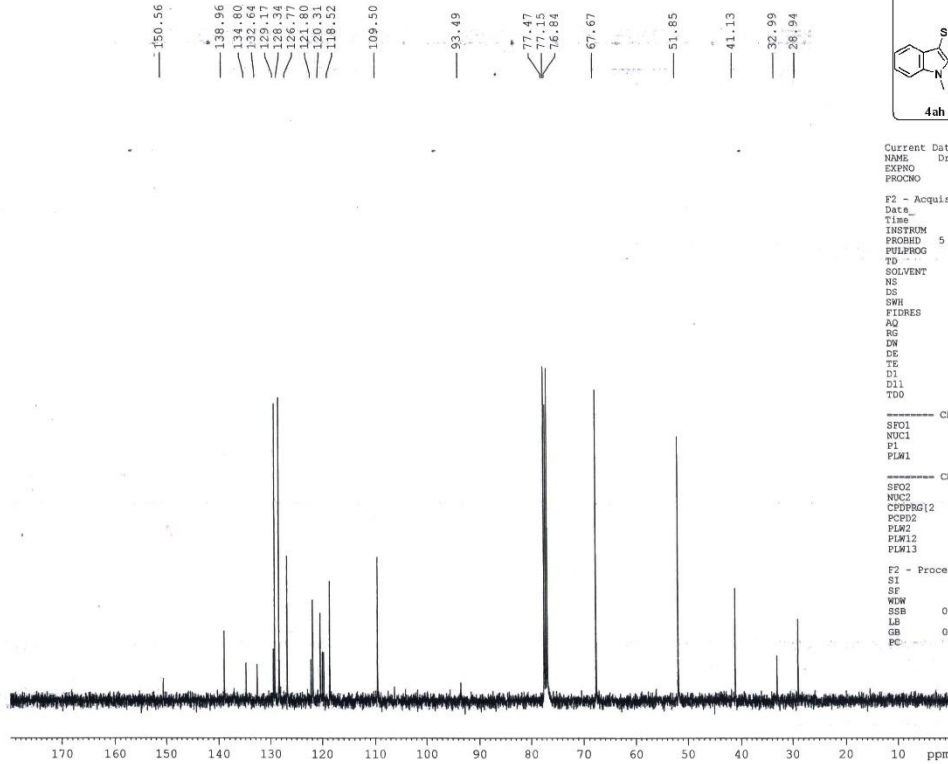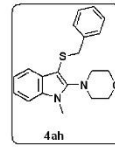

Current Data Parameters  
NAME Dr. A MAJER 2023  
EXPNO 535  
PROCNO 1

F2 - Acquisition Parameters  
Date 20230726  
Time 22.03  
INSTRUM spect  
PROBHD 5 mm PABBO BB/  
PULPROG zgpg30  
TD 32768  
SOLVENT CDCl<sub>3</sub>  
NS 120  
DS 2  
SWH 24038.461 Hz  
FIDRES 0.733596 Hz  
AQ 0.6815744 sec  
RG 67.61  
DW 20.800 usec  
DE 6.50 usec  
TE 296.8 K  
SI 2.00000000 sec  
D11 0.03000000 sec  
TDO 1

CHANNEL f1  
SFO1 100.6278568 MHz  
NUC1 13C  
PI 8.90 usec  
PLW1 54.00000000 W

CHANNEL f2  
SFO2 400.1516006 MHz  
NUC2 1H  
CPDPRG2 waltz16  
PCPD2 90.00 usec  
PLW2 12.00000000 W  
PLW12 0.32231000 W  
PLW13 0.16212000 W

F2 - Processing parameters  
SI 16384  
SF 100.6177894 MHz  
WDW EM  
SSB 0  
LB 1.00 Hz  
GB 0  
PC 1.00

<sup>1</sup>H NMR: 400 MHz; Solvent: CDCl<sub>3</sub>

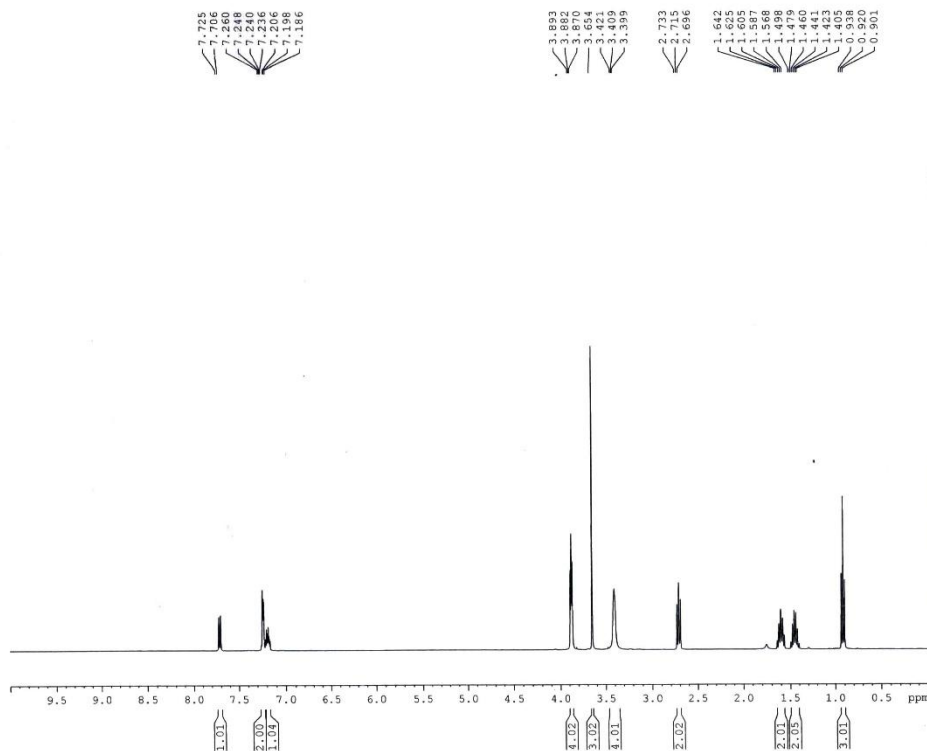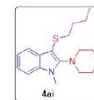

Current Data Parameters  
NAME Dr. A MAJEE 2023  
EXPNO 487  
PROCNO 1

F2 - Acquisition Parameters  
Date\_ 20230712  
Time 0.25  
INSTRUM spect  
PROBHD 5 mm PABBO BB/  
PULPROG zg30  
TD 32768  
SOLVENT CDCl3  
NS 8  
DS 1  
SWH 8223.685 Hz  
FIDRES 0.250967 Hz  
AQ 1.992344 sec  
RG 32.25  
DW 60.800 usec  
DE 6.50 usec  
TE 298.2 K  
D1 1.00000000 sec  
TDO 1

==== CHANNEL f1 =====  
SF01 400.1524711 MHz  
NUC1 1H  
P1 14.75 usec  
PLW1 12.00000000 W

F2 - Processing parameters  
SI 16384  
SF 400.1500122 MHz  
WDW EM  
SSB 0  
LB 0.30 Hz  
GB 0  
PC 2.00

<sup>13</sup>C{<sup>1</sup>H} NMR: 100 MHz; Solvent: CDCl<sub>3</sub>

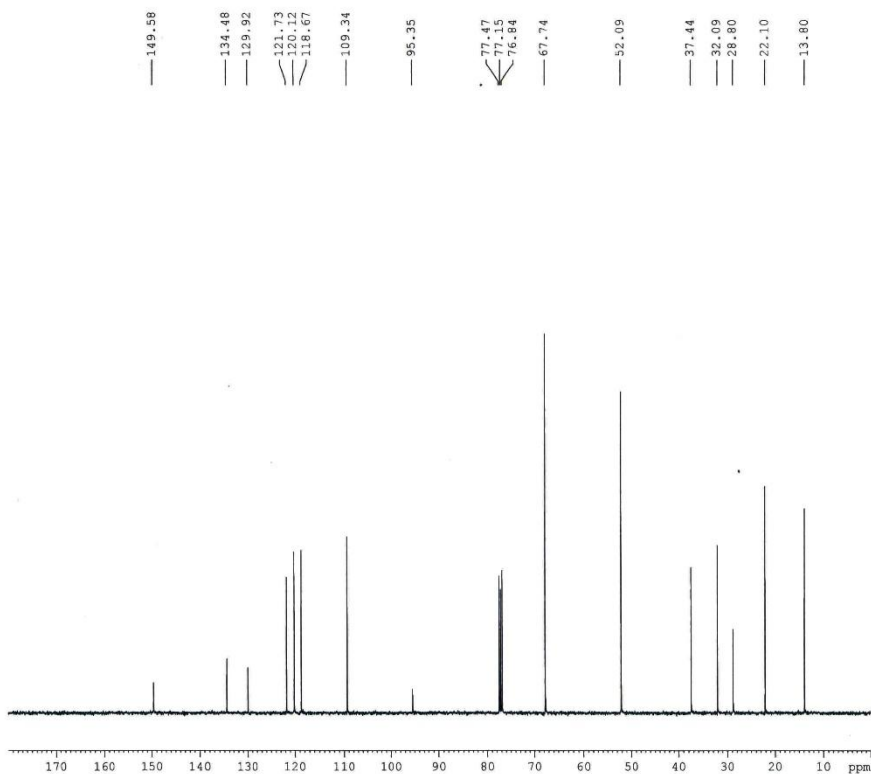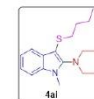

Current Data Parameters  
NAME Dr. A MAJEE 2023  
EXPNO 488  
PROCNO 1

F2 - Acquisition Parameters  
Date\_ 20230712  
Time 0.39  
INSTRUM spect  
PROBHD 5 mm PABBO BB/  
PULPROG zgpg30  
TD 32768  
SOLVENT CDCl3  
NS 256  
DS 2  
SWH 24038.461 Hz  
FIDRES 0.733896 Hz  
AQ 0.6815744 sec  
RG 32.25  
DW 20.800 usec  
DE 6.50 usec  
TE 298.2 K  
D1 2.00000000 sec  
D11 0.03000000 sec  
TDC 1

==== CHANNEL f1 =====  
SF01 100.6278588 MHz  
NUC1 13C  
P1 8.90 usec  
PLW1 54.00000000 W

==== CHANNEL f2 =====  
SF02 400.1516006 MHz  
NUC2 1H  
CPDPRG2 waltz16  
PCPD2 90.00 usec  
PLW2 12.00000000 W  
PLW12 0.3221000 W  
PLW13 0.16212000 W

F2 - Processing parameters  
SI 16384  
SF 100.6177955 MHz  
WDW EM  
SSB 0  
LB 1.00 Hz  
GB 0  
PC 1.00

<sup>1</sup>H NMR: 400 MHz; Solvent: CDCl<sub>3</sub>

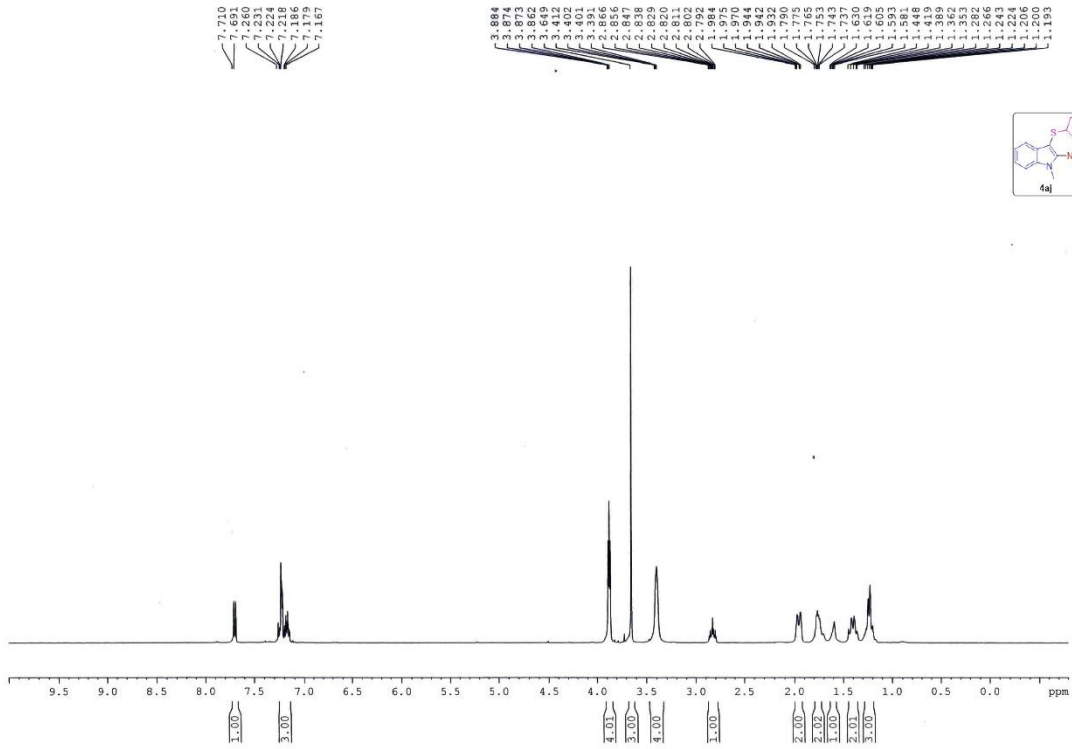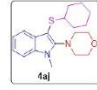

<sup>13</sup>C{<sup>1</sup>H} NMR: 100 MHz; Solvent: CDCl<sub>3</sub>

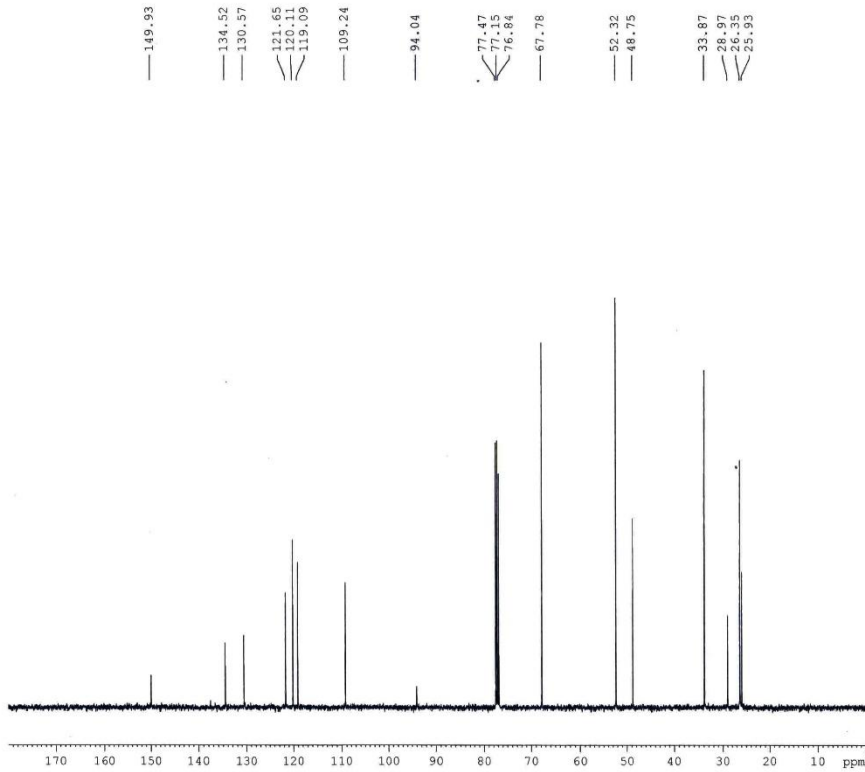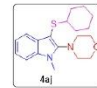

Current Data Parameters  
NAME Dr. A MAJEE 2023  
EXPNO 482  
PROCNO 1

F2 - Acquisition Parameters  
Date\_ 20230709  
Time 16.03  
INSTRUM spect  
PROBHD 5-mm PABBO BB/  
PULPROG zgpg30  
TD 32768  
SOLVENT CDCl<sub>3</sub>  
NS 512  
DS 2  
SWH 24038.461 Hz  
FIDRES 0.733596 Hz  
AQ 0.6815744 sec  
RG 5.13  
DW 20.800 usec  
DE 6.50 usec  
TE 297.0 K  
D1 2.00000000 sec  
D11 0.03000000 sec  
YD0 1

----- CHANNEL f1 -----  
SFO1 100.6278588 MHz  
NUC1 13C  
P1 8.90 usec  
PLW1 54.00000000 W

----- CHANNEL f2 -----  
SFO2 400.1516006 MHz  
NUC2 1H  
CPDPRG2 waltz16  
PCPD2 90.00 usec  
PLM2 12.00000000 W  
PLW2 0.32231000 W  
PLM13 0.16212000 W

F2 - Processing parameters  
SI 16384  
SF 100.6177902 MHz  
WDW EM  
SSB 0  
LB 1.00 Hz  
GB 0  
PC 1.00

<sup>1</sup>H NMR: 400 MHz; Solvent: CDCl<sub>3</sub>

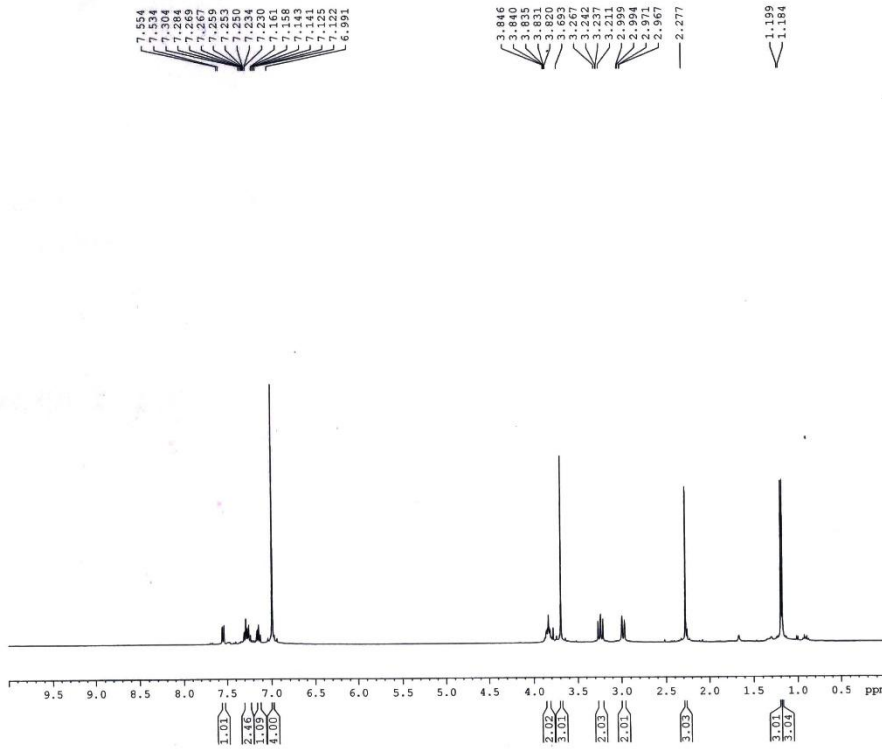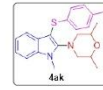

Current Data Parameters  
NAME Dr. A MAJEE 2023  
EXPNO 870  
PROCNO 1

F2 - Acquisition Parameters  
Date\_ 20231203  
Time 0.58  
INSTRUM spect  
PROBHD 5 mm PABBO BB/  
PULPROG zg30  
TD 32768  
SOLVENT cdcl3  
NS 8  
DS 1  
SWH 9223.685 Hz  
FIDRES 0.250967 Hz  
AQ 1.9922944 sec  
RG 40.87  
DW 60.800 usec  
DE 6.50 usec  
TE 292.6 K  
D1 1.0000000 sec  
TDO 1

----- CHANNEL f1 -----  
SF01 400.1524711 MHz  
NUC1 1H  
P1 14.75 usec  
PLW1 12.00000000 W

F2 - Processing parameters  
SI 16384  
SF 400.1500097 MHz  
WDW EM  
SSB 0  
LB 0.30 Hz  
GB 0  
PC 2.00

<sup>13</sup>C{<sup>1</sup>H} NMR: 100 MHz; Solvent: CDCl<sub>3</sub>

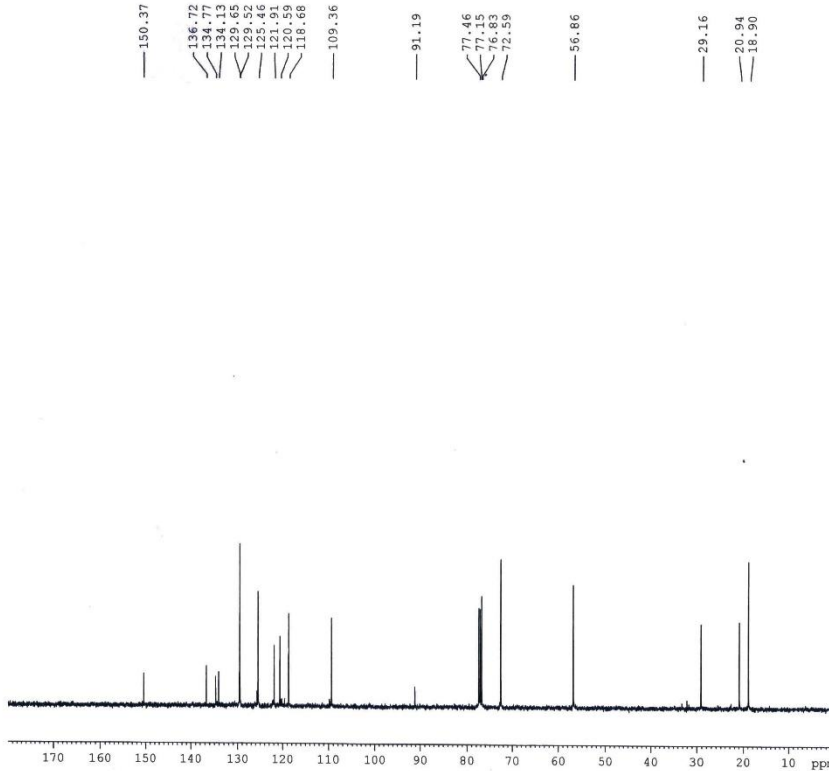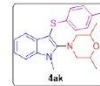

Current Data Parameters  
NAME Dr. A MAJEE 2023  
EXPNO 871  
PROCNO 1

F2 - Acquisition Parameters  
Date\_ 20231203  
Time 1.10  
INSTRUM spect  
PROBHD 5 mm PABBO BB/  
PULPROG zgpg30  
TD 32768  
SOLVENT CDCl3  
NS 120  
DS 2  
SWH 24038.461 Hz  
FIDRES 0.733596 Hz  
AQ 0.6813746 sec  
RG 40.87  
DW 20.800 usec  
DE 6.50 usec  
TE 293.6 K  
D1 2.0000000 sec  
D11 0.0300000 sec  
TDO 1

----- CHANNEL f1 -----  
SF01 100.6278588 MHz  
NUC1 13C  
P1 8.90 usec  
PLW1 54.00000000 W

----- CHANNEL f2 -----  
SF02 400.1516006 MHz  
NUC2 1H  
CPDPRG12 waltz16  
FCDPR 90.000 usec  
PLW2 12.00000000 W  
PLW12 0.32231000 W  
PLW13 0.16212000 W

F2 - Processing parameters  
SI 16384  
SF 100.6177946 MHz  
WDW EM  
SSB 0  
LB 1.00 Hz  
GB 0  
PC 1.00

<sup>1</sup>H of VBSP-1

<sup>1</sup>H NMR: 400 MHz; Solvent: CDCl<sub>3</sub>

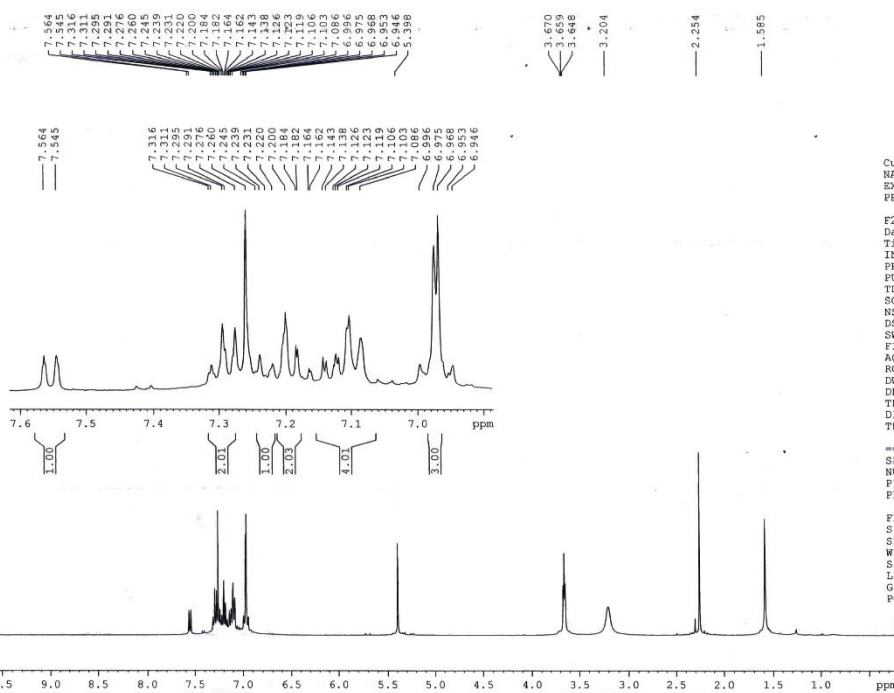

<sup>13</sup>C NMR: 100 MHz; Solvent: CDCl<sub>3</sub>

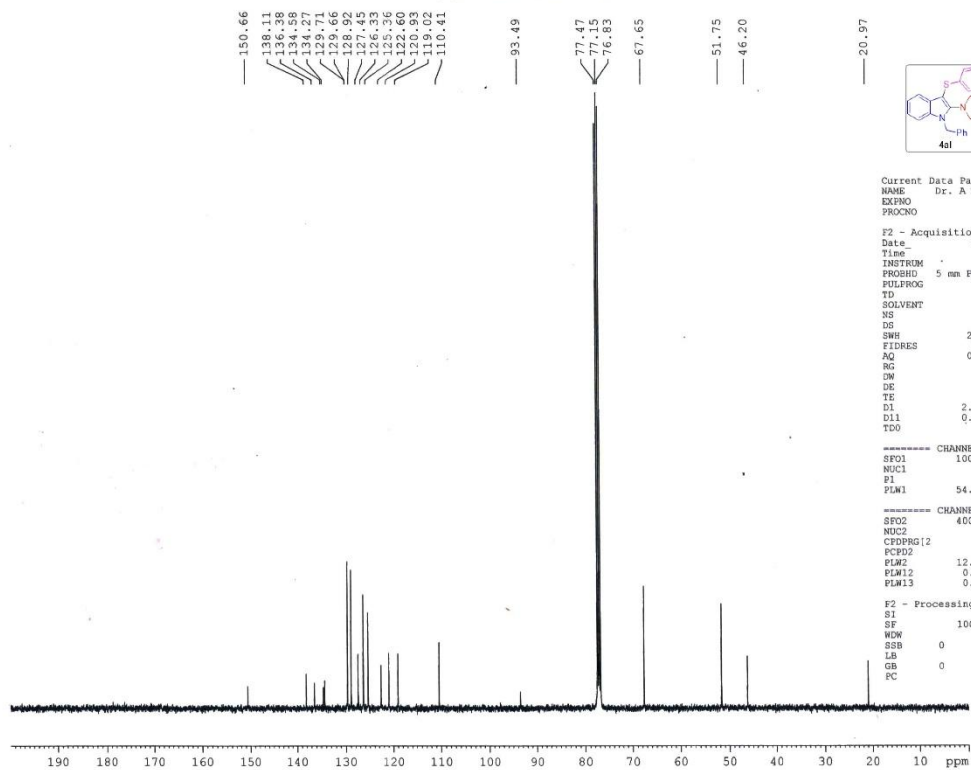

<sup>1</sup>H NMR: 400 MHz; Solvent: CDCl<sub>3</sub>

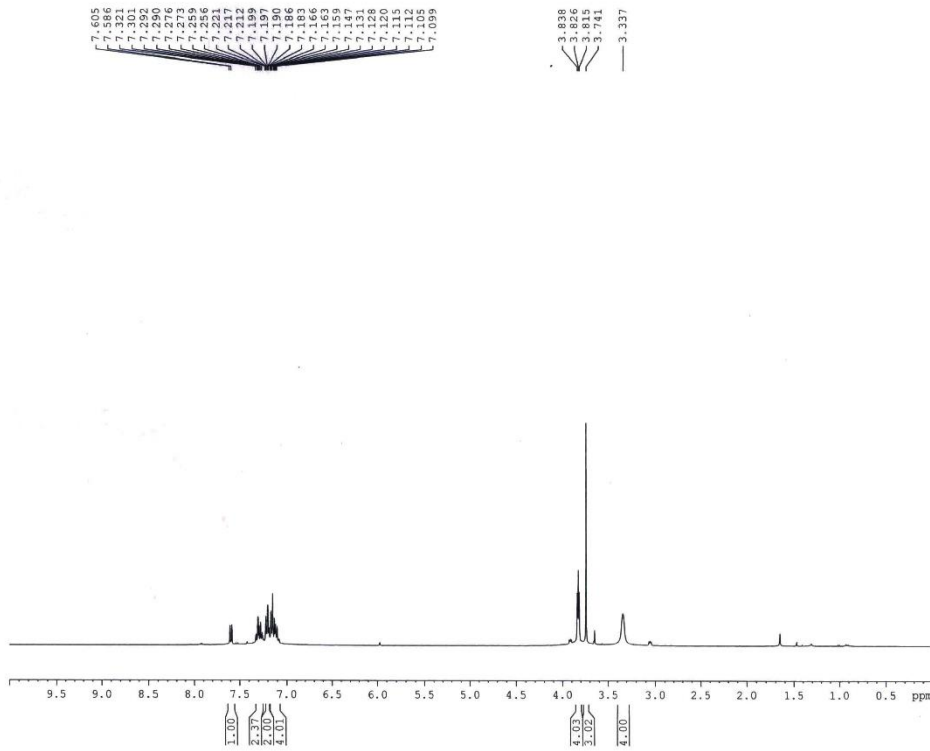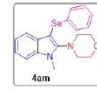

Current Data Parameters  
NAME Dr. A MAJEE 2023  
EXFNO 494  
PROCNO 1

F2 - Acquisition Parameters:  
Date 20230718  
Time 14.33  
INSTRUM spect  
PROBHD 5 mm PABBO BB/  
PULPROG zg30  
TD 32768  
SOLVENT CDCl<sub>3</sub>  
NS 8  
DS 1  
SWH 8223.685 Hz  
FIDRES 0.250967 Hz  
AQ 1.5922944 sec  
RG 54.07  
DW 60.800 usec  
DE 6.50 usec  
TE 299.4 K  
D1 1.00000000 sec  
TDO 1

----- CHANNEL f1 -----  
SF01 400.1524711 MHz  
NUC1 1H  
P1 14.75 usec  
PLW1 12.00000000 W

F2 - Processing parameters  
SI 16384  
SF 400.1500097 MHz  
WDW EM  
SSB 0  
LB 0.30 Hz  
GB 0  
PC 2.00

13C of VBSP-283/8

<sup>13</sup>C NMR: 100 MHz; Solvent: CDCl<sub>3</sub>

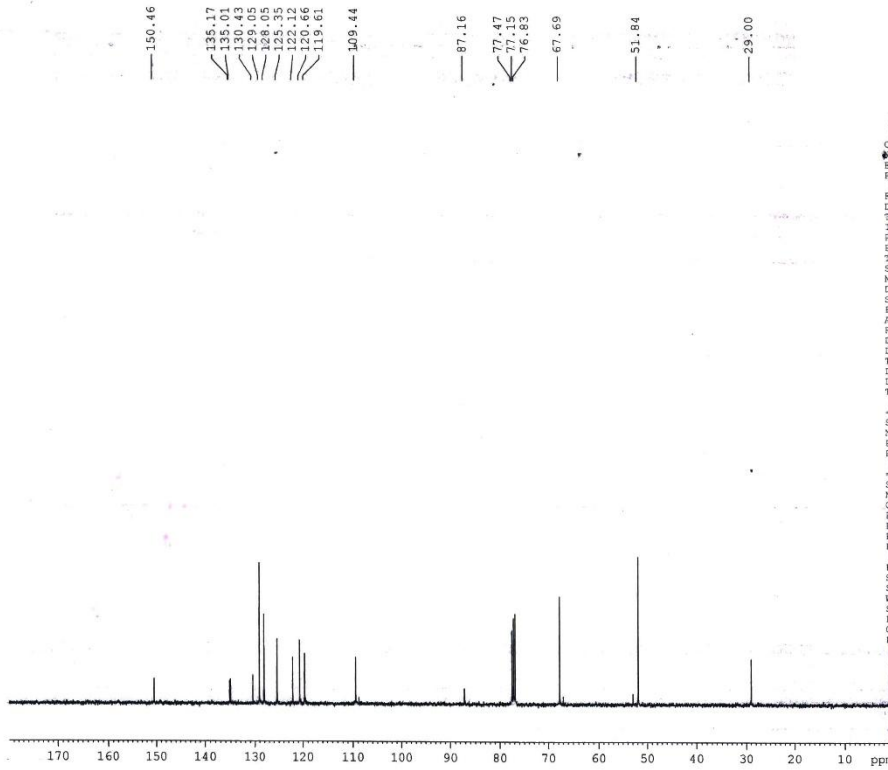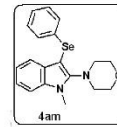

Current Data Parameters  
NAME Dr. A MAJEE 2023  
EXFNO 496  
PROCNO 1

F2 - Acquisition Parameters:  
Date 20230718  
Time 14.56  
INSTRUM spect  
PROBHD 5 mm PABBO BB/  
PULPROG zgpg30  
TD 32768  
SOLVENT CDCl<sub>3</sub>  
NS 120  
DS 2  
SWH 24039.461 Hz  
FIDRES 0.733596 Hz  
AQ 0.6915744 sec  
RG 54.07  
DW 20.800 usec  
DE 6.50 usec  
TE 299.9 K  
D1 2.00000000 sec  
D11 0.03000000 sec  
TDO 1

----- CHANNEL f1 -----  
SF01 100.6278588 MHz  
NUC1 13C  
P1 8.50 usec  
PLW1 54.00000000 W

----- CHANNEL f2 -----  
SF02 400.1516006 MHz  
NUC2 1H  
CDEPRG2 waltz16  
PCPD2 80.00 usec  
PLW2 12.00000000 W  
PLW12 0.32210000 W  
PLW13 0.16212000 W

F2 - Processing parameters  
SI 16384  
SF 100.6177932 MHz  
WDW EM  
SSB 0  
LB 1.00 Hz  
GB 0  
PC 1.00

<sup>1</sup>H NMR: 400 MHz; Solvent: CDCl<sub>3</sub>

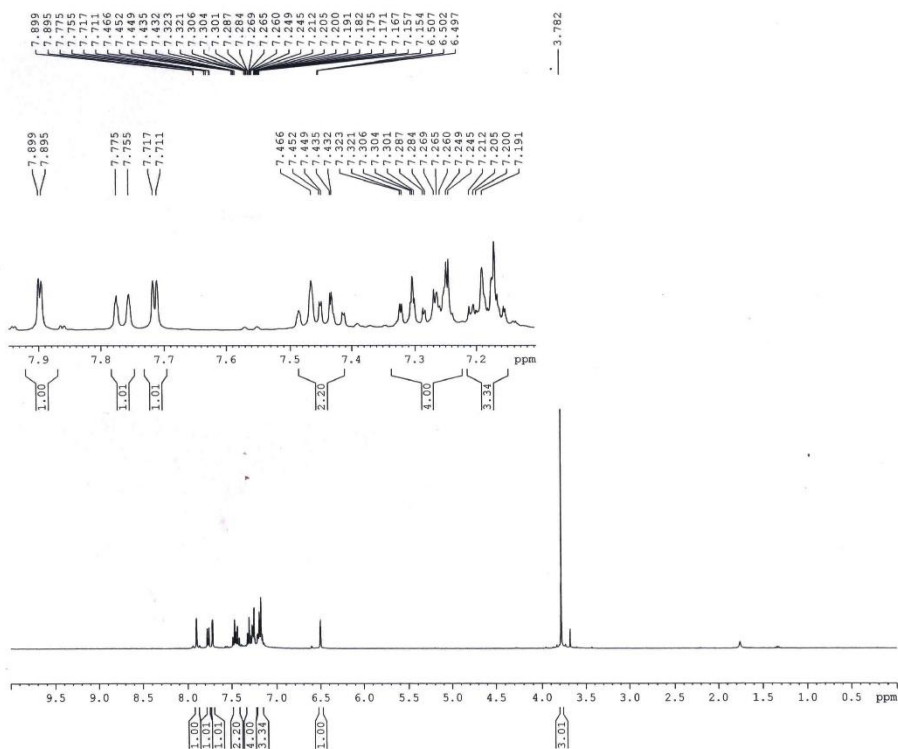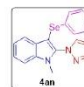

Current Data Parameters  
NAME Dr. A MAJEE 2023  
EXPRO 761  
PROCNO 1

F2 - Acquisition Parameters  
Date 20231102  
Time 17.23  
INSTRUM spect  
PROBHD 5 mm PABBO BB/  
PULPROG zg30  
TD 32768  
SOLVENT CDCl3  
NS 8  
DS 1  
SWH 8223.685 Hz  
FIDRES 0.250967 Hz  
AQ 1.9922944 sec  
RG 93.46  
DW 60.800 usec  
DE 6.50 usec  
TE 293.6 K  
D1 1.00000000 sec  
TDO 1

===== CHANNEL f1 =====  
SFO1 400.1524711 MHz  
NUC1 1H  
P1 14.75 usec  
PLW1 12.00000000 W

F2 - Processing parameters  
SI 16384  
SF 400.1499916 MHz  
WDW EM  
SSB 0  
LB 0.30 Hz  
GB 0  
PC 2.00

<sup>13</sup>C [H] NMR: 100 MHz; Solvent: CDCl<sub>3</sub>

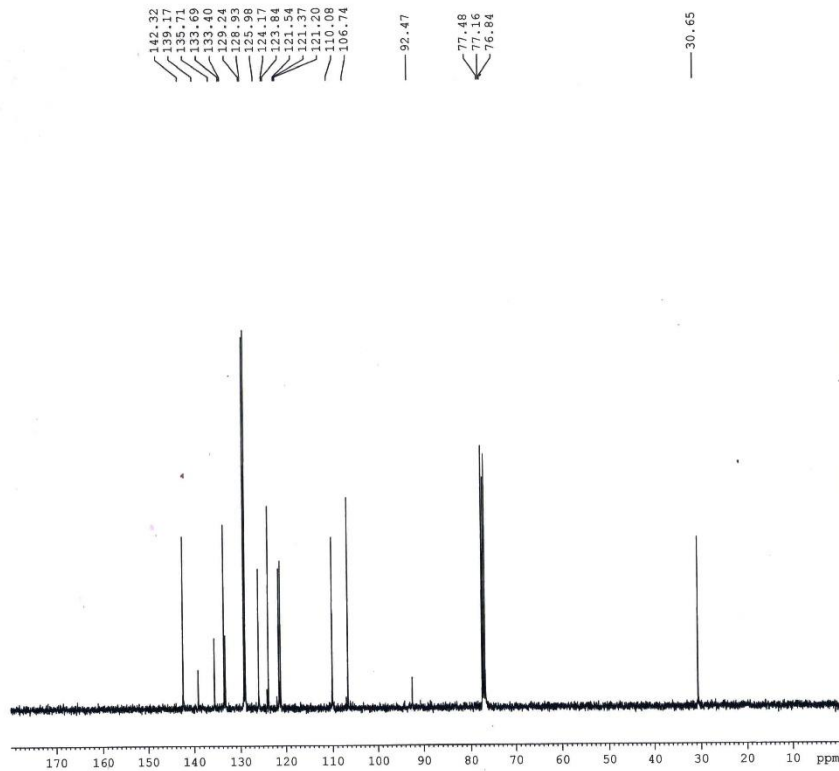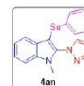

Current Data Parameters  
NAME Dr. A MAJEE 2023  
EXPRO 762  
PROCNO 1

F2 - Acquisition Parameters  
Date 20231102  
Time 17.39  
INSTRUM spect  
PROBHD 5 mm PABBO BB/  
PULPROG zgpg30  
TD 32768  
SOLVENT CDCl3  
NS 256  
DS 2  
SWH 24038.461 Hz  
FIDRES 0.733596 Hz  
AQ 0.6815744 sec  
RG 93.46  
DW 20.800 usec  
DE 6.50 usec  
TE 293.7 K  
D1 2.00000000 sec  
D11 0.03000000 sec  
TDO 1

===== CHANNEL f1 =====  
SFO1 100.6278588 MHz  
NUC1 13C  
P1 8.90 usec  
PLW1 54.00000000 W

===== CHANNEL f2 =====  
SFO2 400.1516006 MHz  
NUC2 1H  
CPDPRG2 waltz16  
PCPD2 90.00 usec  
PLW2 12.00000000 W  
PLW12 0.32231000 W  
PLW13 0.16212000 W

F2 - Processing parameters  
SI 16384  
SF 100.6177916 MHz  
WDW EM  
SSB 0  
LB 1.00 Hz  
GB 0  
PC 1.00





<sup>1</sup>H NMR: 400 MHz; Solvent: CDCl<sub>3</sub>

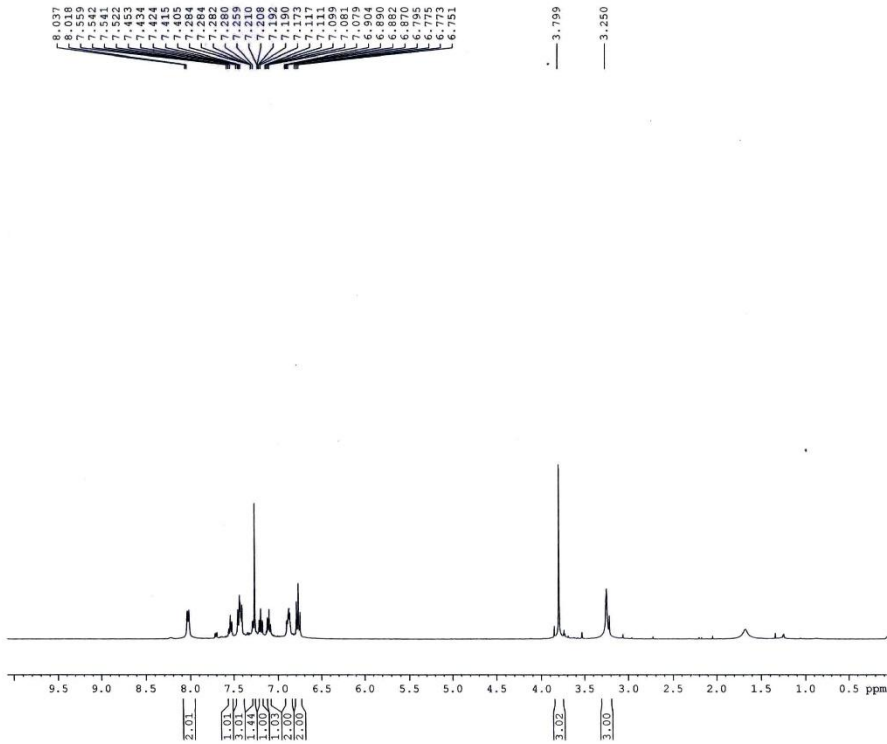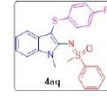

Current Data Parameters  
NAME Dr. A MAJEE 2024  
EXPNO 38  
PROCNO 1

F2 - Acquisition Parameters  
Date\_ 20240203  
Time 20.59  
INSTRUM spect  
PROBHD 5 mm PABBO BB/  
FULPROG zg30  
TD 32768  
SOLVENT CDCl<sub>3</sub>  
NS 8  
DS 1  
SWH 8223.685 Hz  
FIDRES 0.250967 Hz  
AQ 1.9922944 sec  
RG 135.7  
DW 60.800 usec  
DE 6.50 usec  
TE 291.0 K  
D1 1.00000000 sec  
TDO 1

----- CHANNEL f1 -----  
SF01 400.1524711 MHz  
NUC1 1H  
F1 14.75 usec  
PLW1 12.00000000 W

F2 - Processing parameters  
SI 16384  
SF 400.1500097 MHz  
WDW EM  
SSB 0  
LB 0.30 Hz  
GB 0  
PC 2.00

<sup>13</sup>C{<sup>1</sup>H} NMR: 100 MHz; Solvent: CDCl<sub>3</sub>

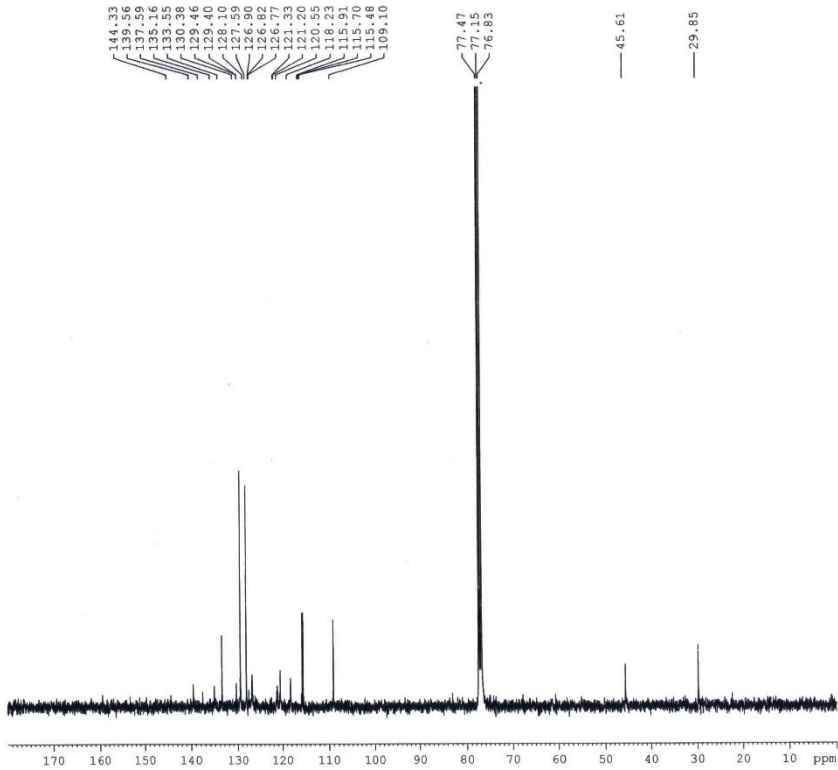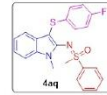

Current Data Parameters  
NAME Dr. A MAJEE 2024  
EXPNO 40  
PROCNO 1

F2 - Acquisition Parameters  
Date\_ 20240203  
Time 22.19  
INSTRUM spect  
PROBHD 5 mm PABBO BB/  
FULPROG zgpg30  
TD 32768  
SOLVENT CDCl<sub>3</sub>  
NS 1500  
DS 2  
SWH 24038.461 Hz  
FIDRES 0.733596 Hz  
AQ 0.6815744 sec  
RG 135.7  
DW 20.800 usec  
DE 6.50 usec  
TE 292.2 K  
D1 2.00000000 sec  
D11 0.03000000 sec  
TDO 1

----- CHANNEL f1 -----  
SF01 100.6278588 MHz  
NUC1 13C  
F1 8.90 usec  
PLW1 54.00000000 W

----- CHANNEL f2 -----  
SF02 400.1516006 MHz  
NUC2 1H  
CPRPRG12 waltz16  
PCD2 90.00 usec  
FLM2 12.00000000 W  
FLM12 0.32231000 W  
FLM13 0.16212000 W

F2 - Processing parameters  
SI 16384  
SF 100.6178783 MHz  
WDW EM  
SSB 0  
LB 1.00 Hz  
GB 0  
PC 1.00

<sup>1</sup>H NMR: 400 MHz; Solvent: CDCl<sub>3</sub>

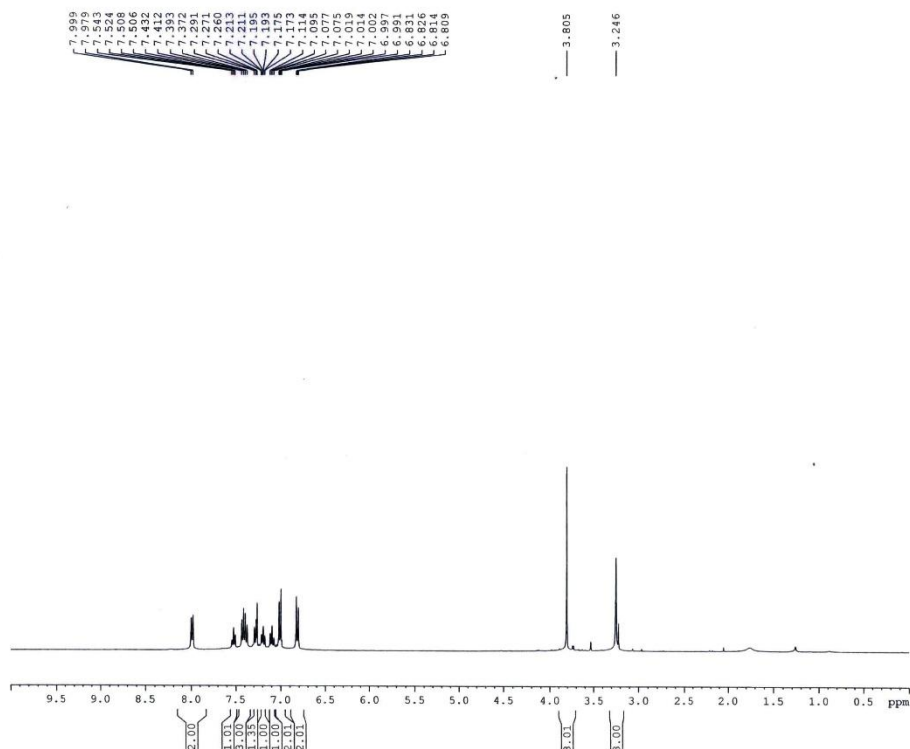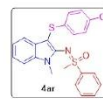

Current Data Parameters  
NAME Dr. A MAJEE 2024  
EXPNO 44  
PROCNO 1

F2 - Acquisition Parameters  
Date 20240204  
Time 18.57  
INSTRUM spect  
PROBHD 5 mm PABBO BB/  
PULPROG zg30  
TD 32768  
SOLVENT CDCl<sub>3</sub>  
NS 8  
DS 1  
SWH 8223.685 Hz  
FIDRES 0.250967 Hz  
AQ 1.9922944 sec  
RG 106.66  
DW 60.800 usec  
DE 6.50 usec  
TE 290.8 K  
D1 1.00000000 sec  
TDO 1

==== CHANNEL f1 =====  
SF01 400.1524711 MHz  
NUC1 <sup>1</sup>H  
P1 14.75 usec  
PLW1 12.00000000 W

F2 - Processing parameters  
SI 16384  
SF 400.1500092 MHz  
WDW EM  
SSB 0  
LB 0 0.30 Hz  
GB 0  
PC 2.00

<sup>13</sup>C NMR: 100 MHz; Solvent: CDCl<sub>3</sub>

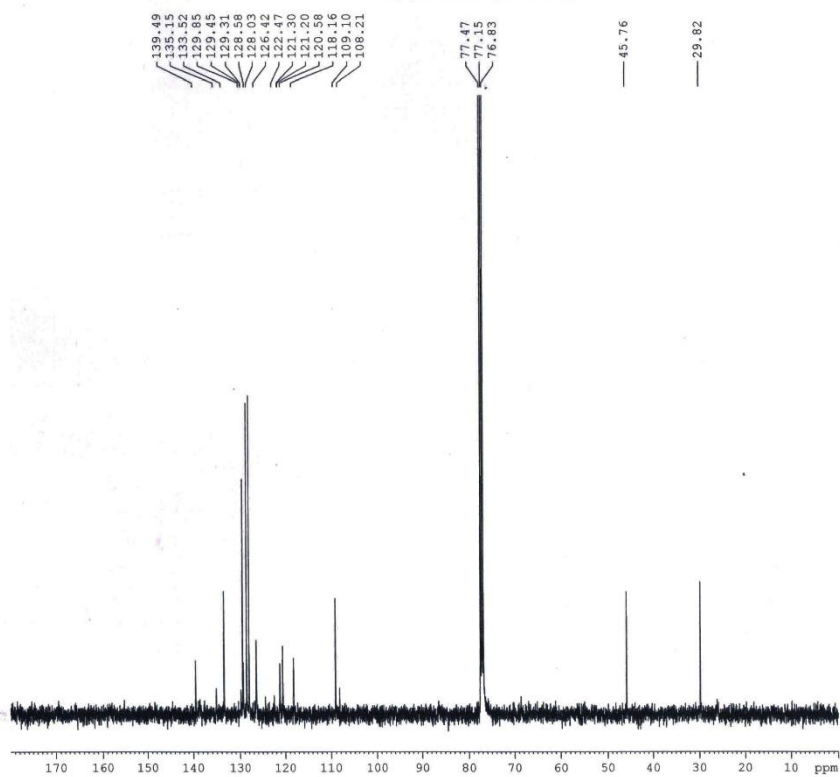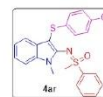

Current Data Parameters  
NAME Dr. A MAJEE 2024  
EXPNO 45  
PROCNO 1

F2 - Acquisition Parameters  
Date 20240204  
Time 19.18  
INSTRUM spect  
PROBHD 5 mm PABBO BB/  
PULPROG zgpg30  
TD 32768  
SOLVENT CDCl<sub>3</sub>  
NS 400  
DS 2  
SWH 24038.461 Hz  
FIDRES 0.733596 Hz  
AQ 0.6815744 sec  
RG 106.66  
DW 20.800 usec  
DE 6.50 usec  
TE 292.1 K  
D1 2.00000000 sec  
D11 0.03000000 sec  
TDO 1

==== CHANNEL f1 =====  
SF01 100.6278568 MHz  
NUC1 <sup>13</sup>C  
P1 8.90 usec  
PLW1 54.00000000 W

==== CHANNEL f2 =====  
SF02 400.1516006 MHz  
NUC2 <sup>1</sup>H  
CPCPRG12 waltz16  
PCPD2 90.00 usec  
PLW2 12.00000000 W  
PLM12 0.32231000 W  
PLM13 0.16212000 W

F2 - Processing parameters  
SI 16384  
SF 100.6177887 MHz  
WDW DM  
SSB 0  
LB 1.00 Hz  
GB 0  
PC 1.00

<sup>1</sup>H NMR: 400 MHz; Solvent: CDCl<sub>3</sub>

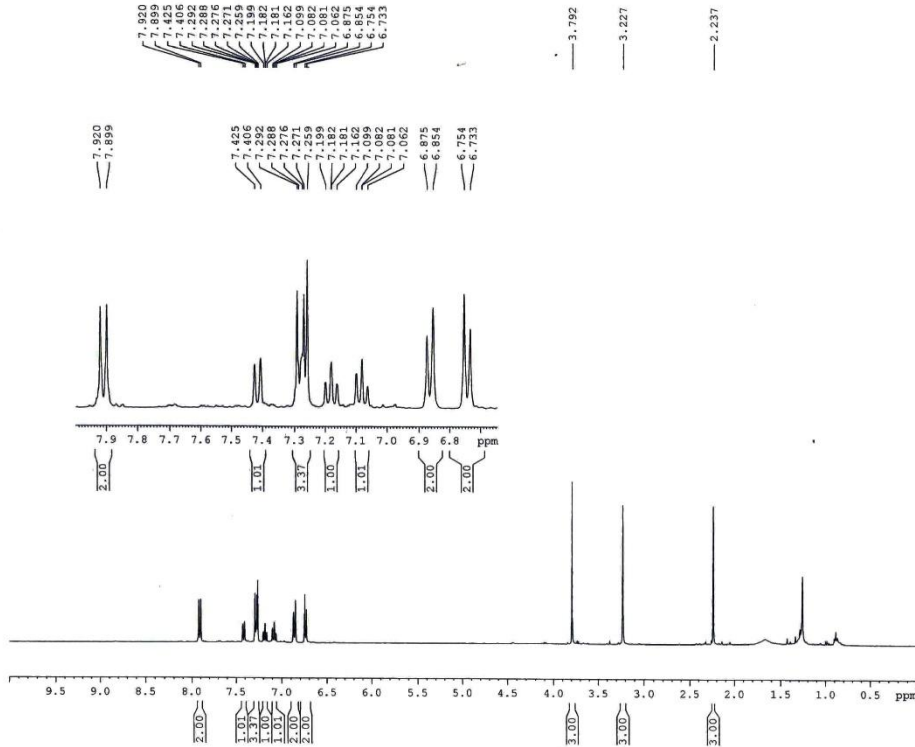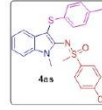

Current Data Parameters  
NAME Dr. A MAJEE 2023  
EXNO 506  
PROCNO 1

F2 - Acquisition Parameters  
Date\_ 20230719  
Time 17.18  
INSTRUM spect  
PROBHD 5 mm PABBO BB/  
PULPROG zg30  
TD 32768  
SOLVENT CDCl3  
NS 8  
DS 1  
SWH 8223.685 Hz  
FIDRES 0.250967 Hz  
AQ 1.992944 sec  
RG 93.46  
DW 60.800 usec  
DE 6.50 usec  
TE 297.3 K  
D1 1.0000000 sec  
TDO 1

CHANNEL f1  
SFO1 400.1524711 MHz  
NUC1 <sup>1</sup>H  
P1 14.75 usec  
PLW1 12.0000000 W

F2 - Processing parameters  
SI 16384  
SF 400.1500097 MHz  
WDW EM  
SSB 0  
LB 0.30 Hz  
GB 0  
PC 2.00

<sup>13</sup>C{<sup>1</sup>H} NMR: 100 MHz; Solvent: CDCl<sub>3</sub>

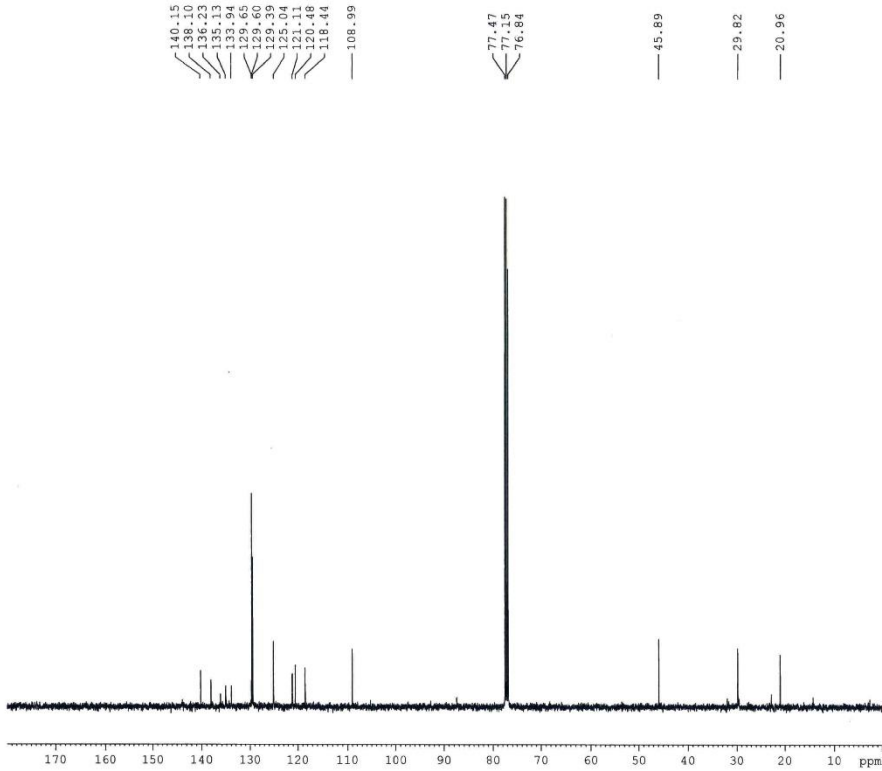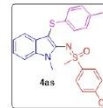

Current Data Parameters  
NAME Dr. A MAJEE 2023  
EXNO 507  
PROCNO 1

F2 - Acquisition Parameter  
Date\_ 20230719  
Time 17.53  
INSTRUM spect  
PROBHD 5 mm PABBO BB/  
PULPROG zg30  
TD 32768  
SOLVENT CDCl3  
NS 512  
DS 2  
SWH 24038.461 Hz  
FIDRES 0.733596 Hz  
AQ 0.6815744 sec  
RG 93.46  
DW 20.800 usec  
DE 6.50 usec  
TE 297.7 K  
D1 2.0000000 sec  
D11 0.03000000 sec  
TDO 1

CHANNEL f1  
SFO1 100.6278588 MHz  
NUC1 <sup>13</sup>C  
P1 8.90 usec  
PLW1 54.0000000 W

CHANNEL f2  
SFO2 400.1516006 MHz  
NUC2 <sup>1</sup>H  
CPCPD2 waltz16  
PCPD2 90.00 usec  
PLW2 12.0000000 W  
PLW12 0.32231000 W  
PLW13 0.16212000 W

F2 - Processing parameters  
SI 16384  
SF 100.6177858 MHz  
WDW EM  
SSB 0  
LB 1.00 Hz  
GB 0  
PC 1.00

<sup>1</sup>H NMR: 400 MHz; Solvent: CDCl<sub>3</sub>

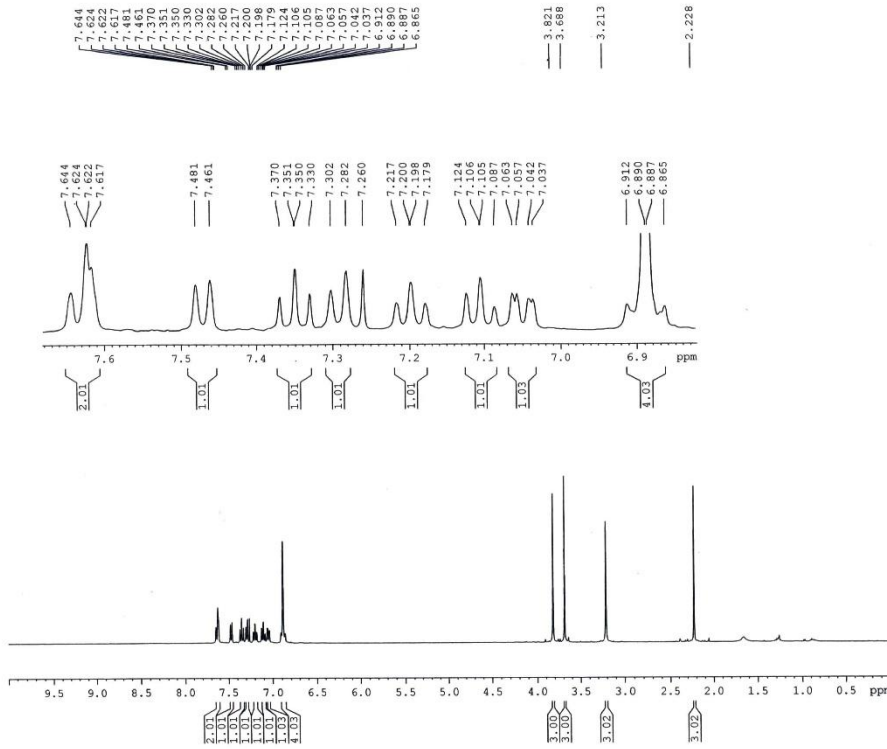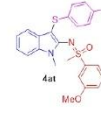

Current Data Parameters  
NAME Dr. A MAJEE 2023  
EXPNO 874  
PROCNO 1

F2 - Acquisition Parameters  
Date\_ 20231203  
Time 20.06  
INSTRUM spect  
PROBHD 5 mm PABBO BB/  
PULPROG zgpg30  
TD 32768  
SOLVENT CDCl3  
NS 8  
DS 1  
SWH 8223.685 Hz  
FIDRES 0.250967 Hz  
AQ 1.9922944 sec  
RG 93.46  
DW 60.800 usec  
DE 6.50 usec  
TE 293.3 K  
D1 1.00000000 sec  
TDO 1

CHANNEL f1  
SF01 400.1524711 MHz  
NUC1 1H  
P1 14.75 usec  
PLW1 12.00000000 W

F2 - Processing parameters  
SI 16384  
SF 400.1500092 MHz  
WDW EM  
SSB 0  
LB 0.30 Hz  
GB 0  
PC 2.00

<sup>13</sup>C NMR: 100 MHz; Solvent: CDCl<sub>3</sub>

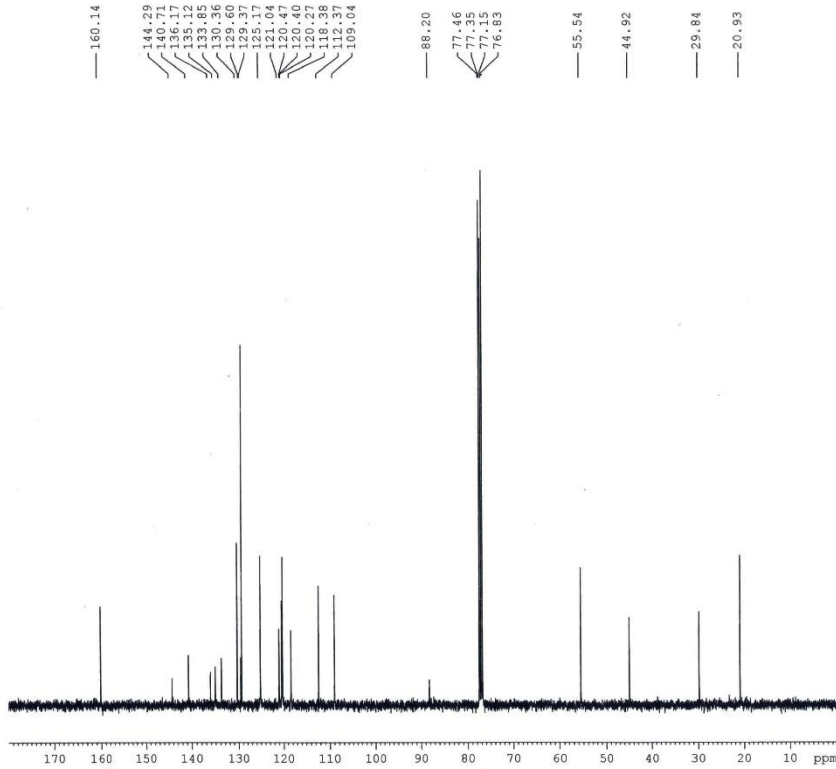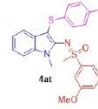

Current Data Parameters  
NAME Dr. A MAJEE 2023  
EXPNO 875  
PROCNO 1

F2 - Acquisition Parameters  
Date\_ 20231203  
Time 20.25  
INSTRUM spect  
PROBHD 5 mm PABBO BB/  
PULPROG zgpg30  
TD 32768  
SOLVENT CDCl3  
NS 320  
DS 2  
SWH 24938.461 Hz  
FIDRES 0.733596 Hz  
AQ 0.6815744 sec  
RG 93.46  
DW 20.800 usec  
DE 6.50 usec  
TE 292.9 K  
D1 2.00000000 sec  
D11 0.03000000 sec  
TDO 1

CHANNEL f1  
SF01 100.6278588 MHz  
NUC1 13C  
P1 8.30 usec  
PLW1 54.00000000 W

CHANNEL f2  
SF02 400.1516006 MHz  
NUC2 1H  
CFPRG(2) waltz16  
PCPD2 90.00 usec  
PLW2 12.00000000 W  
PLW12 0.32231000 W  
PLW13 0.16212000 W

F2 - Processing parameters  
SI 16384  
SF 100.6177902 MHz  
WDW DM  
SSB 0  
LB 1.00 Hz  
GB 0  
PC 1.00

<sup>1</sup>H NMR: 400 MHz; Solvent: CDCl<sub>3</sub>

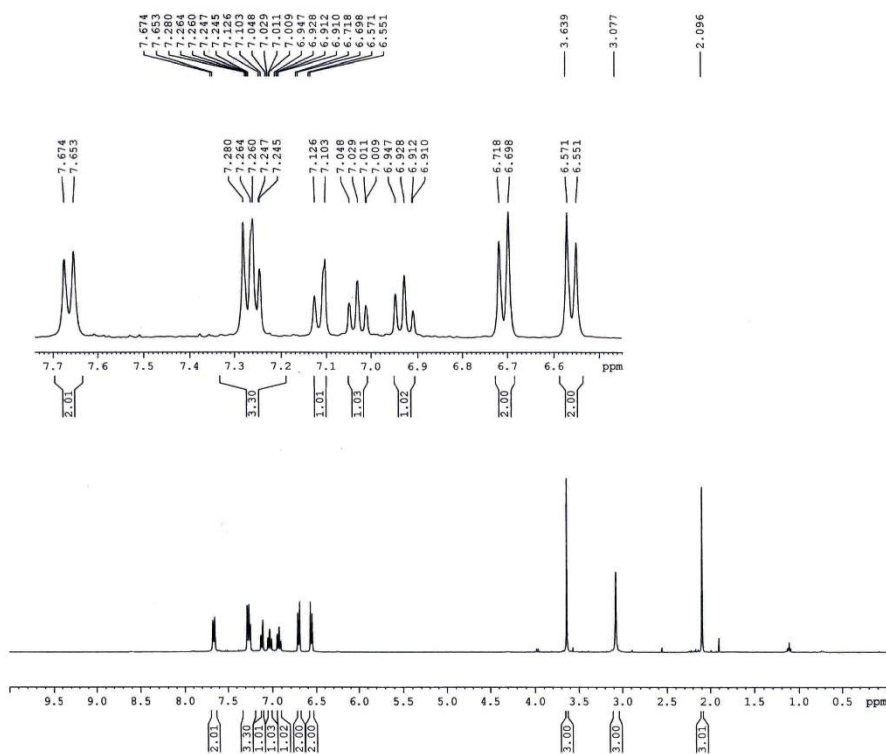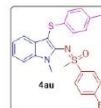

Current Data Parameters  
NAME Dr. A MAJEE 2023  
EXPNO 882  
PROCNO 1

F2 - Acquisition Parameters  
Date\_ 20231204  
Time 13.08  
INSTRUM spect  
PROBHD 5 mm PABBO BB/  
PULPROG zg30  
TD 32768  
SOLVENT CDCl3  
NS 8  
DS 1  
SWH 8223.685 Hz  
FIDRES 0.250967 Hz  
AQ 1.9922944 sec  
RG 93.46  
DW 60.800 usec  
DE 6.50 usec  
TE 291.4 K  
D1 1.00000000 sec  
TDO 1

CHANNEL f1  
SFO1 400.1524711 MHz  
NUC1 1H  
P1 14.75 usec  
PLW1 12.00000000 W

F2 - Processing parameters  
SI 16384  
SF 400.1500724 MHz  
WDW EM  
SSB 0  
LB 0.30 Hz  
GB 0  
PC 2.00

<sup>13</sup>C{<sup>1</sup>H} NMR: 100 MHz; Solvent: CDCl<sub>3</sub>

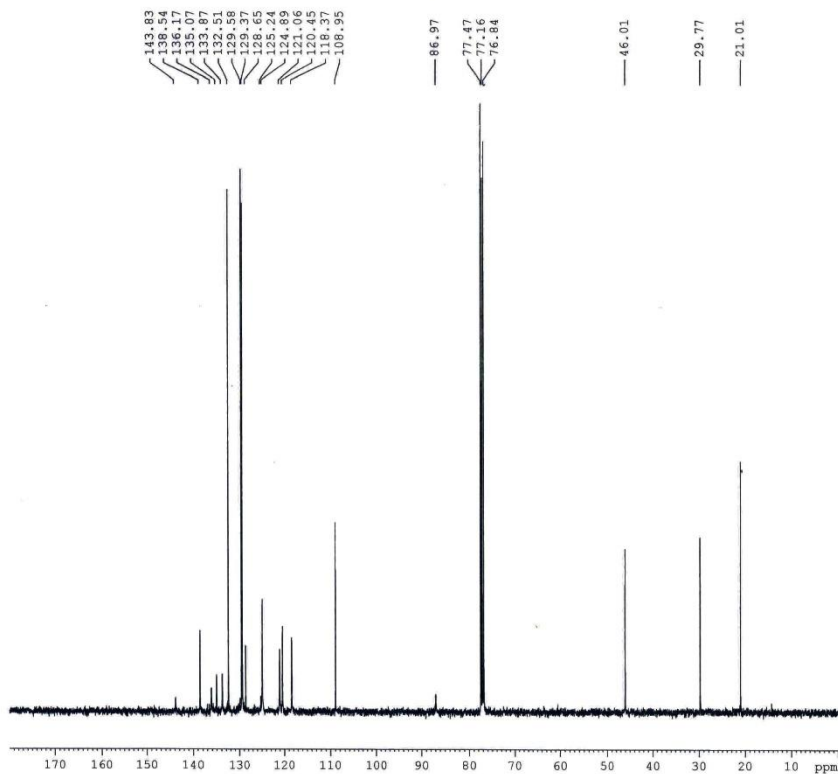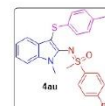

Current Data Parameters  
NAME Dr. A MAJEE 2023  
EXPNO 883  
PROCNO 1

F2 - Acquisition Parameters  
Date\_ 20231204  
Time 13.45  
INSTRUM spect  
PROBHD 5 mm PABBO BB/  
PULPROG zgpg30  
TD 32768  
SOLVENT CDCl3  
NS 720  
DS 2  
SWH 24038.461 Hz  
FIDRES 0.733596 Hz  
AQ 0.6815744 sec  
RG 93.46  
DW 20.800 usec  
DE 6.50 usec  
TE 292.0 K  
D1 2.00000000 sec  
D11 0.03000000 sec  
TDO 1

CHANNEL f1  
SFO1 100.6278588 MHz  
NUC1 13C  
P1 8.50 usec  
PLW1 54.00000000 W

CHANNEL f2  
SFO2 400.1516006 MHz  
NUC2 1H  
CPDPRG2 waltz16  
PCPD2 90.00 usec  
PLW2 12.00000000 W  
PLW12 0.32231000 W  
PLW13 0.16212000 W

F2 - Processing parameters  
SI 16384  
SF 100.617917 MHz  
WDW EM  
SSB 0  
LB 1.00 Hz  
GB 0  
PC 1.00

<sup>1</sup>H of VBSP-RR-8 UP

<sup>1</sup>H NMR: 400 MHz; Solvent: CDCl<sub>3</sub>

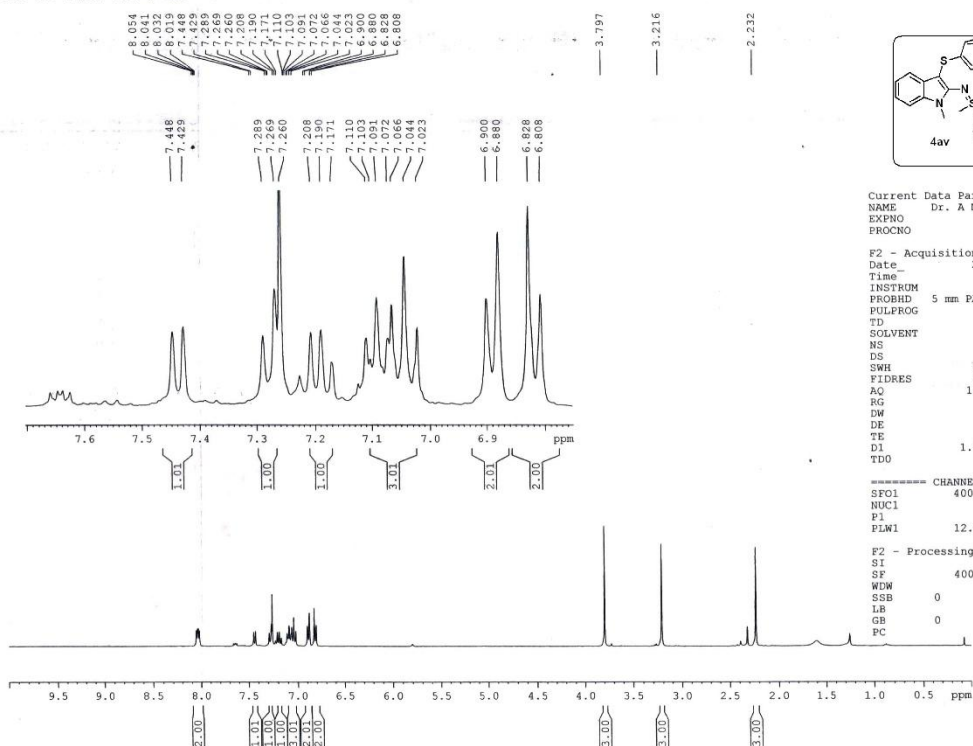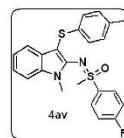

Current Data Parameters  
NAME Dr. A MAJEE 2026-1H  
EXPNO 123  
PROCNO 1  
F2 - Acquisition Parameters  
Date 20260412  
Time 11.00  
INSTRUM spect  
PROBHD 5 mm PABBO BB/  
PULPROG zg30  
TD 32768  
SOLVENT CDCl<sub>3</sub>  
NS 8  
DS 1  
SWH 9223.695 Hz  
FIDRES 0.250967 Hz  
AQ 1.9922944 sec  
RG 135.7  
DW 60.800 usec  
DE 6.50 usec  
TE 293.1 K  
D1 1.00000000 sec  
TDO 1

CHANNEL f1  
SF01 400.1524711 MHz  
NUC1 1H  
P1 14.75 usec  
PLW1 12.00000000 W

F2 - Processing parameters  
SI 16384  
SF 400.1500097 MHz  
WDW EM  
SSB 0  
LB 0.30 Hz  
GB 0  
PC 2.00

<sup>13</sup>C of VBSP-RR-8 UP

<sup>13</sup>C{<sup>1</sup>H} NMR: 100 MHz; Solvent: CDCl<sub>3</sub>

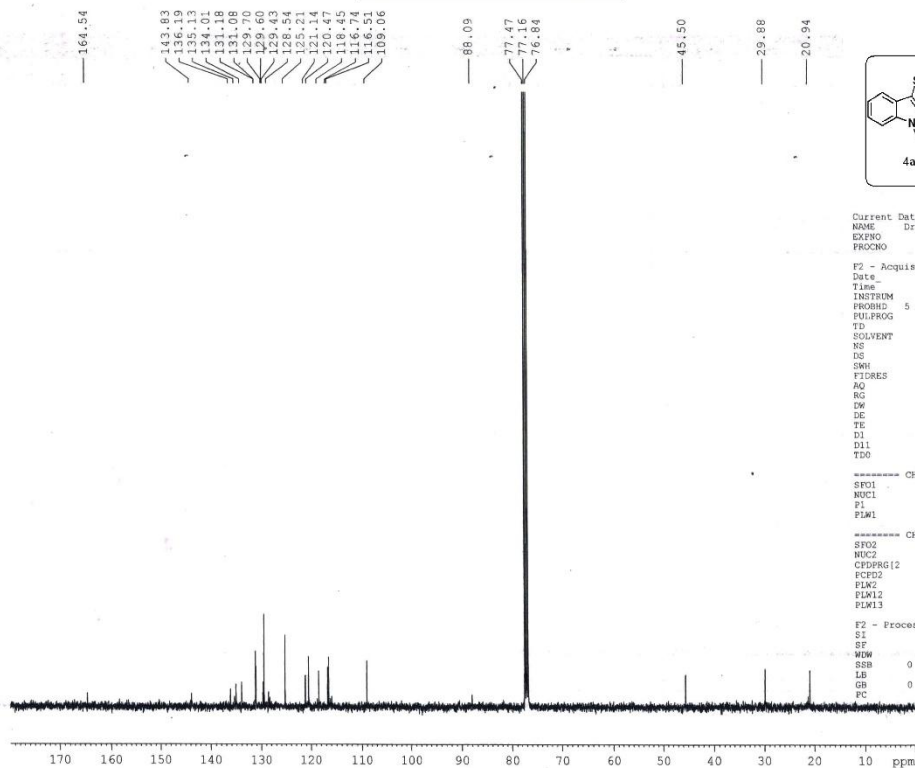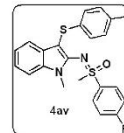

Current Data Parameters  
NAME Dr. A MAJEE-2026-13C  
EXPNO 81  
PROCNO 1

F2 - Acquisition Parameters  
Date 20260412  
Time 11.50  
INSTRUM spect  
PROBHD 5 mm PABBO BB/  
PULPROG zgpg30  
TD 32768  
SOLVENT CDCl<sub>3</sub>  
NS 90  
DS 2  
SWH 24038.461 Hz  
FIDRES 0.733596 Hz  
AQ 0.6815744 sec  
RG 135.7  
DW 20.800 usec  
DE 6.50 usec  
TE 292.5 K  
D1 2.00000000 sec  
D11 0.03000000 sec  
TDO 1

CHANNEL f1  
SF01 100.6278588 MHz  
NUC1 13C  
P1 8.90 usec  
PLW1 54.00000000 W

CHANNEL f2  
SF02 400.1516006 MHz  
NUC2 1H  
CPDPRG12 waltz16  
PCPD 90.00 usec  
PLW2 12.00000000 W  
PLW12 0.32231000 W  
PLW13 0.16215000 W

F2 - Processing parameters  
SI 16384  
SF 100.6177859 MHz  
WDW EM  
SSB 0  
LB 1.00 Hz  
GB 0  
PC 1.40

<sup>1</sup>H NMR: 400 MHz; Solvent: CDCl<sub>3</sub>

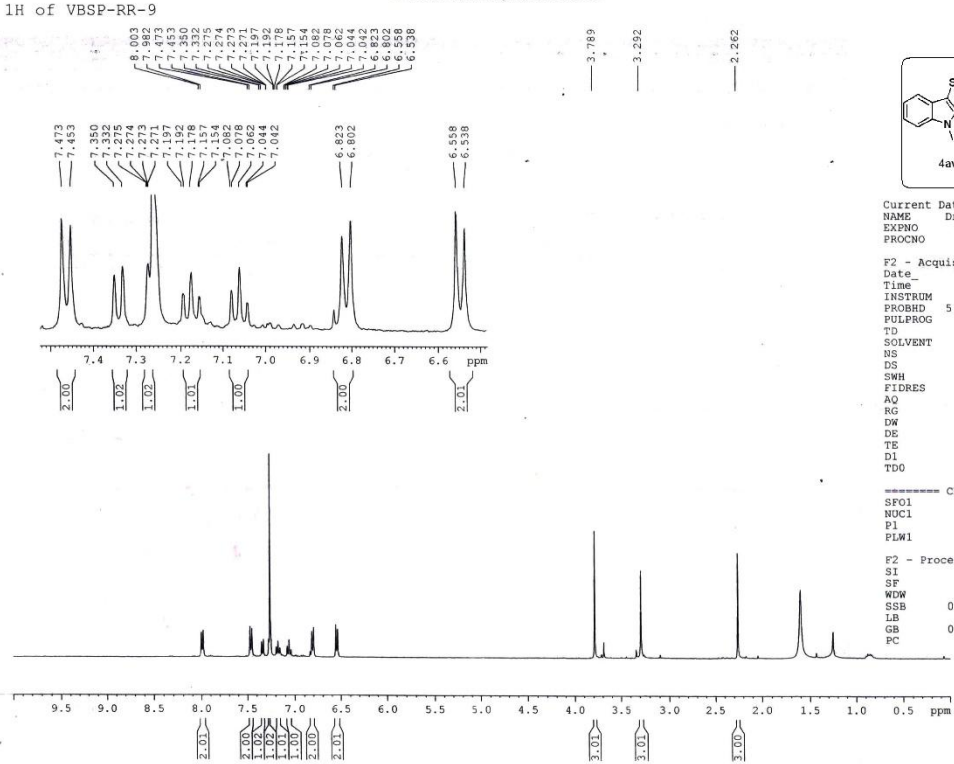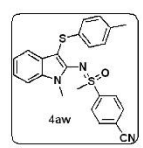

Current Data Parameters  
 NAME Dr. A MAJEE 2026-1H  
 EXPNO 130  
 PROCNO 1

F2 - Acquisition Parameters  
 Date 20260413  
 Time 15.22  
 INSTRUM spect  
 PROBHD 5 mm PABBO BB/  
 PULPROG zg30  
 TD 32768  
 SOLVENT CDCl3  
 NS 8  
 DS 1  
 SWH 8223.685 Hz  
 FIDRES 0.250967 Hz  
 AQ 1.992944 sec  
 RG 186.42  
 DW 60.800 usec  
 DE 6.50 usec  
 TE 292.8 K  
 D1 1.00000000 sec  
 TDO 1

==== CHANNEL f1 =====  
 SF01 400.1524711 MHz  
 NUC1 1H  
 P1 14.75 usec  
 PLW1 12.00000000 W

F2 - Processing parameters  
 SI 16384  
 SF 400.1500097 MHz  
 WDW EM  
 SSB 0  
 LB 0.30 Hz  
 GB 0  
 PC 2.00

<sup>13</sup>C NMR of VBSP-RR-9 rpt

<sup>13</sup>C[<sup>1</sup>H] NMR: 100 MHz; Solvent: CDCl<sub>3</sub>

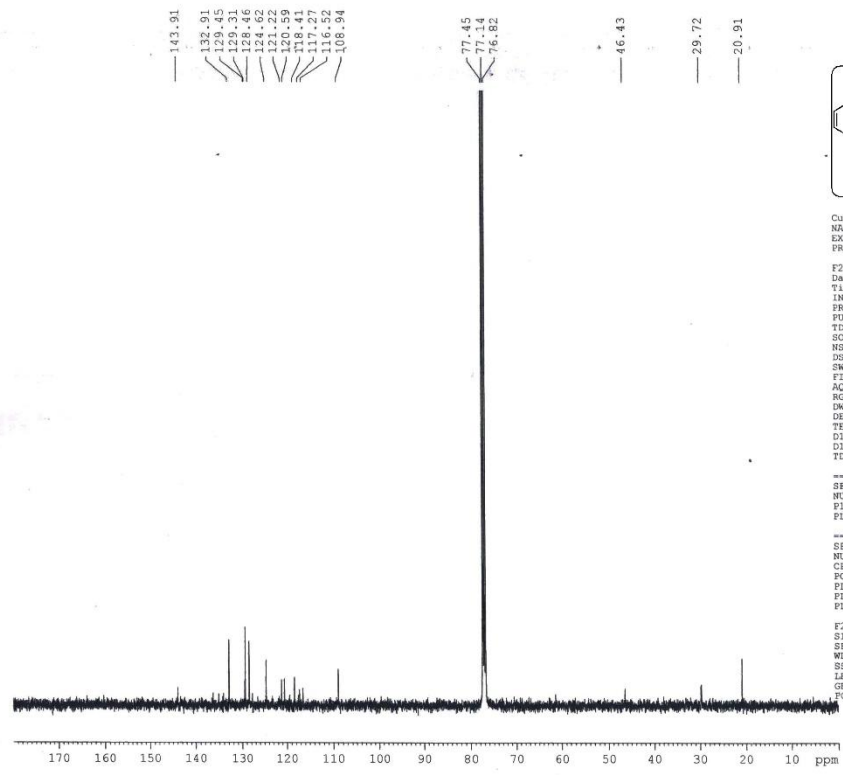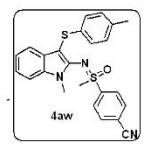

Current Data Parameters  
 NAME Dr. A MAJEE-2026-13C  
 EXPNO 91  
 PROCNO 1

F2 - Acquisition Parameters  
 Date 20260413  
 Time 23.52  
 INSTRUM spect  
 PROBHD 5 mm PABBO BB/  
 PULPROG zgpg30  
 TD 32768  
 SOLVENT CDCl3  
 NS 2400  
 DS 2  
 SWH 24039.461 Hz  
 FIDRES 0.733596 Hz  
 AQ 0.6815744 sec  
 RG 186.42  
 DW 20.800 usec  
 DE 6.50 usec  
 TE 296.1 K  
 D1 2.00000000 sec  
 D11 0.03000000 sec  
 TDO 1

==== CHANNEL f1 =====  
 SF01 100.6278588 MHz  
 NUC1 13C  
 P1 8.90 usec  
 PLW1 54.00000000 W

==== CHANNEL f2 =====  
 SF02 400.1516006 MHz  
 NUC2 1H  
 CPDPRG(2) waltz16  
 PCPD 90.00 usec  
 PLW2 12.00000000 W  
 PLW12 0.32231000 W  
 PLW13 0.16215000 W

F2 - Processing parameters  
 SI 16384  
 SF 100.6177868 MHz  
 WDW EM  
 SSB 0  
 LB 1.00 Hz  
 GB 0  
 PC 1.40

<sup>1</sup>H NMR: 400 MHz; Solvent: CDCl<sub>3</sub>

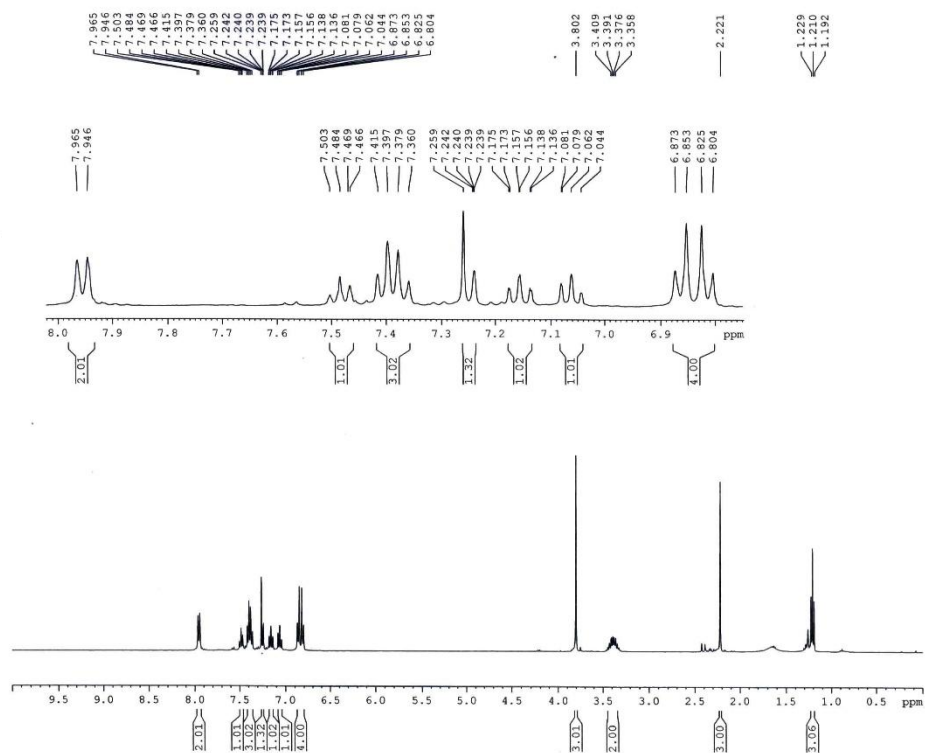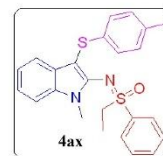

Current Data Parameters  
NAME Dr. A MAJEE 2023  
EXPNO 751  
PROCNO 1

F2 - Acquisition Parameters  
Date 20231018  
Time 14.36  
INSTRUM spect  
PROBHD 5 mm PABBO BB/  
PULPROG zg30  
TD 32768  
SOLVENT CDCl<sub>3</sub>  
NS 8  
DS 1  
SWH 8223.685 Hz  
FIDRES 0.250967 Hz  
AQ 1.9922944 sec  
RG 135.7  
DW 60.800 usec  
DE 6.50 usec  
TE 297.3 K  
D1 1.00000000 sec  
TDO 1

===== CHANNEL f1 =====  
SF01 400.1524711 MHz  
NUC1 1H  
P1 14.75 usec  
PLW1 12.00000000 W

F2 - Processing parameters  
SI 16384  
SF 400.1500097 MHz  
WDW EM  
SSB 0  
LB 0.30 Hz  
GB 0  
PC 2.00

<sup>13</sup>C{<sup>1</sup>H} NMR: 100 MHz; Solvent: CDCl<sub>3</sub>

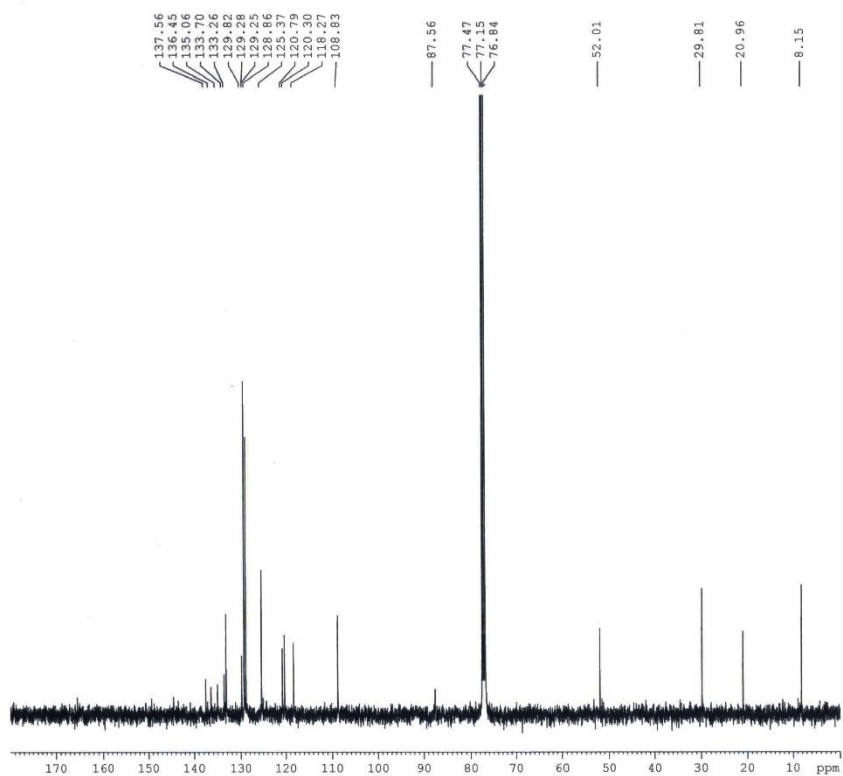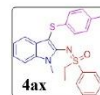

Current Data Parameters  
NAME Dr. A MAJEE 2023  
EXPNO 752  
PROCNO 1

F2 - Acquisition Parameters  
Date 20231018  
Time 15.09  
INSTRUM spect  
PROBHD 5 mm PABBO BB/  
PULPROG zgpg30  
TD 32768  
SOLVENT CDCl<sub>3</sub>  
NS 2  
DS 2  
SWH 24038.461 Hz  
FIDRES 0.733596 Hz  
AQ 0.6815744 sec  
RG 135.7  
DW 20.800 usec  
DE 6.50 usec  
TE 297.4 K  
D1 2.00000000 sec  
D11 0.03000000 sec  
TDO 1

===== CHANNEL f1 =====  
SF01 100.6278588 MHz  
NUC1 13C  
P1 8.90 usec  
PLW1 54.00000000 W

===== CHANNEL f2 =====  
SF02 400.1516006 MHz  
NUC2 1H  
CPDPRG2 waltz16  
PCPD2 90.00 usec  
PLW2 12.00000000 W  
PLW12 0.32231000 W  
PLW13 0.16212000 W

F2 - Processing parameters  
SI 16384  
SF 100.6177858 MHz  
WDW EM  
SSB 0  
LB 1.00 Hz  
GB 0  
PC 1.00

<sup>1</sup>H NMR: 400 MHz; Solvent: CDCl<sub>3</sub>

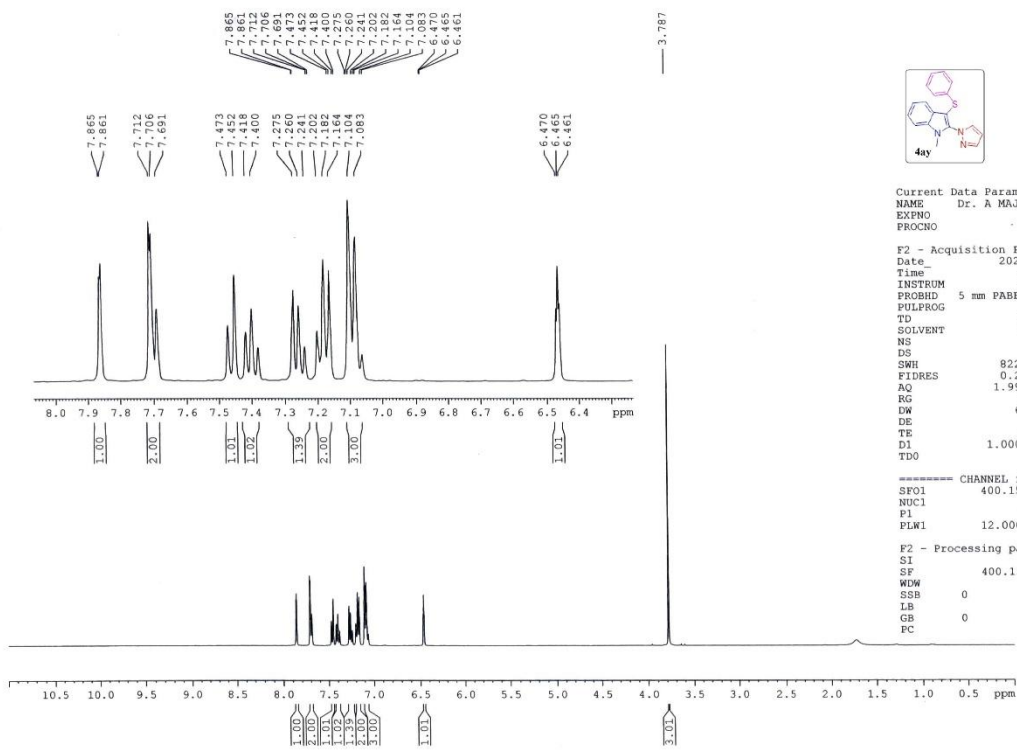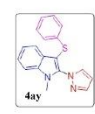

Current Data Parameters  
NAME Dr. A MAJEE 2025-1H  
EXPNO 259  
PROCNO 1

F2 - Acquisition Parameters  
Date 20250620  
Time 16.18  
INSTRUM spect  
PROBHD 5 mm PABBO BB/  
PULPROG zg30  
TD 32768  
SOLVENT CDCl3  
NS 8  
DS 1  
SWH 8223.685 Hz  
FIDRES 0.250967 Hz  
AQ 1.992944 sec  
RG 77.59  
DW 60.800 usec  
DE 6.50 usec  
TE 293.5 K  
D1 1.0000000 sec  
TDO 1

==== CHANNEL f1 =====  
SFO1 400.1524711 MHz  
NUC1 1H  
P1 14.75 usec  
PLW1 12.00000000 W

F2 - Processing parameters  
SI 16384  
SF 400.1500037 MHz  
WDW EM  
SSB 0  
LB 0.30 Hz  
GB 0  
PC 2.00

<sup>13</sup>C NMR: 100 MHz; Solvent: CDCl<sub>3</sub>

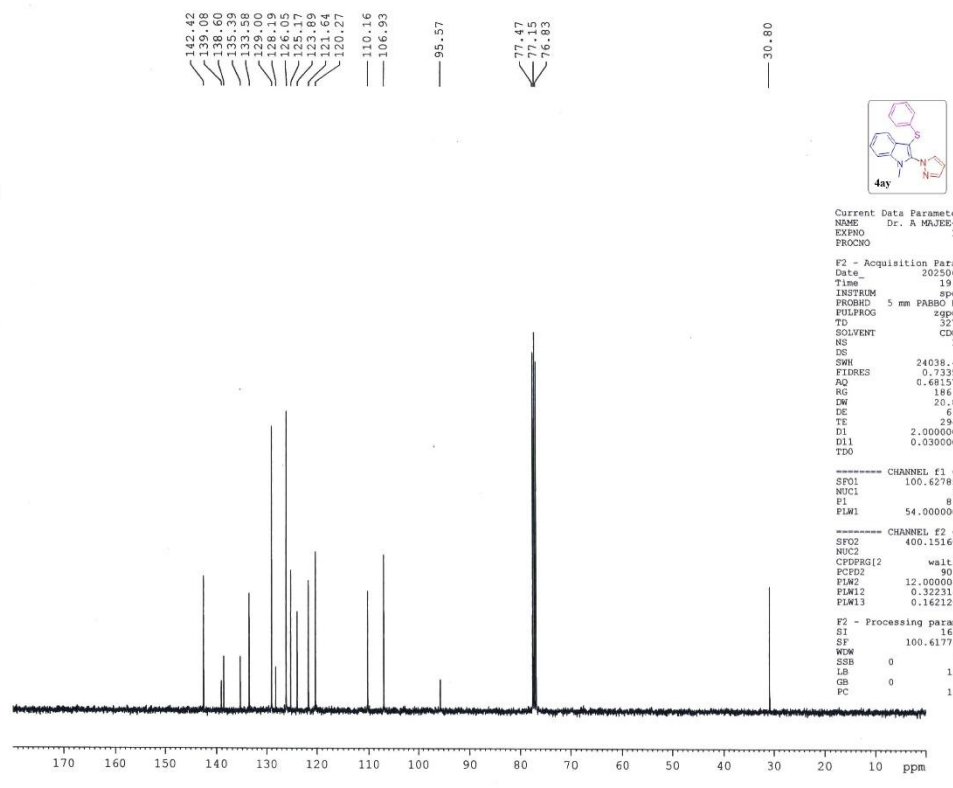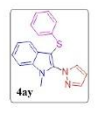

Current Data Parameters  
NAME Dr. A MAJEE-2025-13C  
EXPNO 179  
PROCNO 1

F2 - Acquisition Parameters  
Date 20250620  
Time 19.03  
INSTRUM spect  
PROBHD 5 mm PABBO BB/  
PULPROG zgpg30  
TD 32768  
SOLVENT CDCl3  
NS 300  
DS 2  
SWH 24038.461 Hz  
FIDRES 0.733596 Hz  
AQ 0.6815744 sec  
RG 186.42  
DW 20.800 usec  
DE 6.50 usec  
TE 294.5 K  
D1 2.0000000 sec  
D11 0.0500000 sec  
TDO 1

==== CHANNEL f1 =====  
SFO1 100.6278588 MHz  
NUC1 13C  
P1 8.90 usec  
PLW1 54.00000000 W

==== CHANNEL f2 =====  
SFO2 400.1516006 MHz  
NUC2 1H  
CPCPRG2 waitz16  
RG2 90.00 usec  
P1A2 12.00000000 W  
P1A2 0.32231000 W  
P1A13 0.16212000 W

F2 - Processing parameters  
SI 16384  
SF 100.6177867 MHz  
WDW EM  
SSB 0  
LB 1.00 Hz  
GB 0  
PC 1.40



<sup>1</sup>H of VBSPTP- Sph

<sup>1</sup>H NMR: 400 MHz; Solvent: CDCl<sub>3</sub>

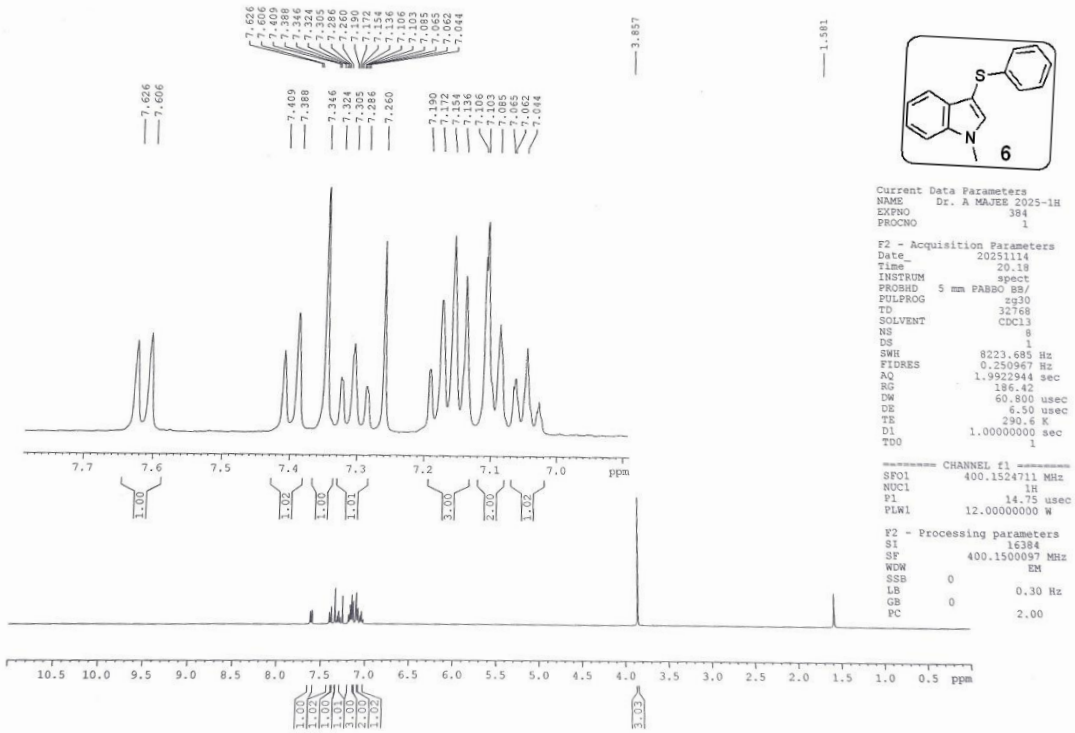

<sup>13</sup>C of VBSPTP- Sph

<sup>13</sup>C{<sup>1</sup>H} NMR: 100 MHz; Solvent: CDCl<sub>3</sub>

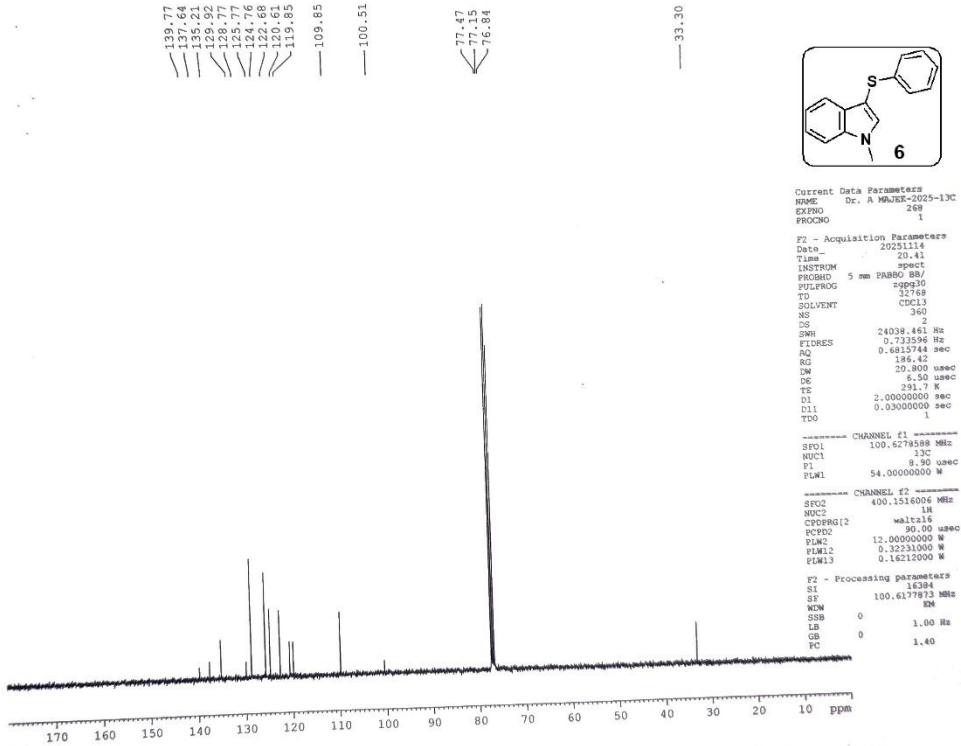

Prof. A. Maiee  
SP-21 9 (0.169) Cm (2:31)

Visva-Bharati University

*Ph-Se-I*

TOF MS ES+  
306.8696 6.44e3

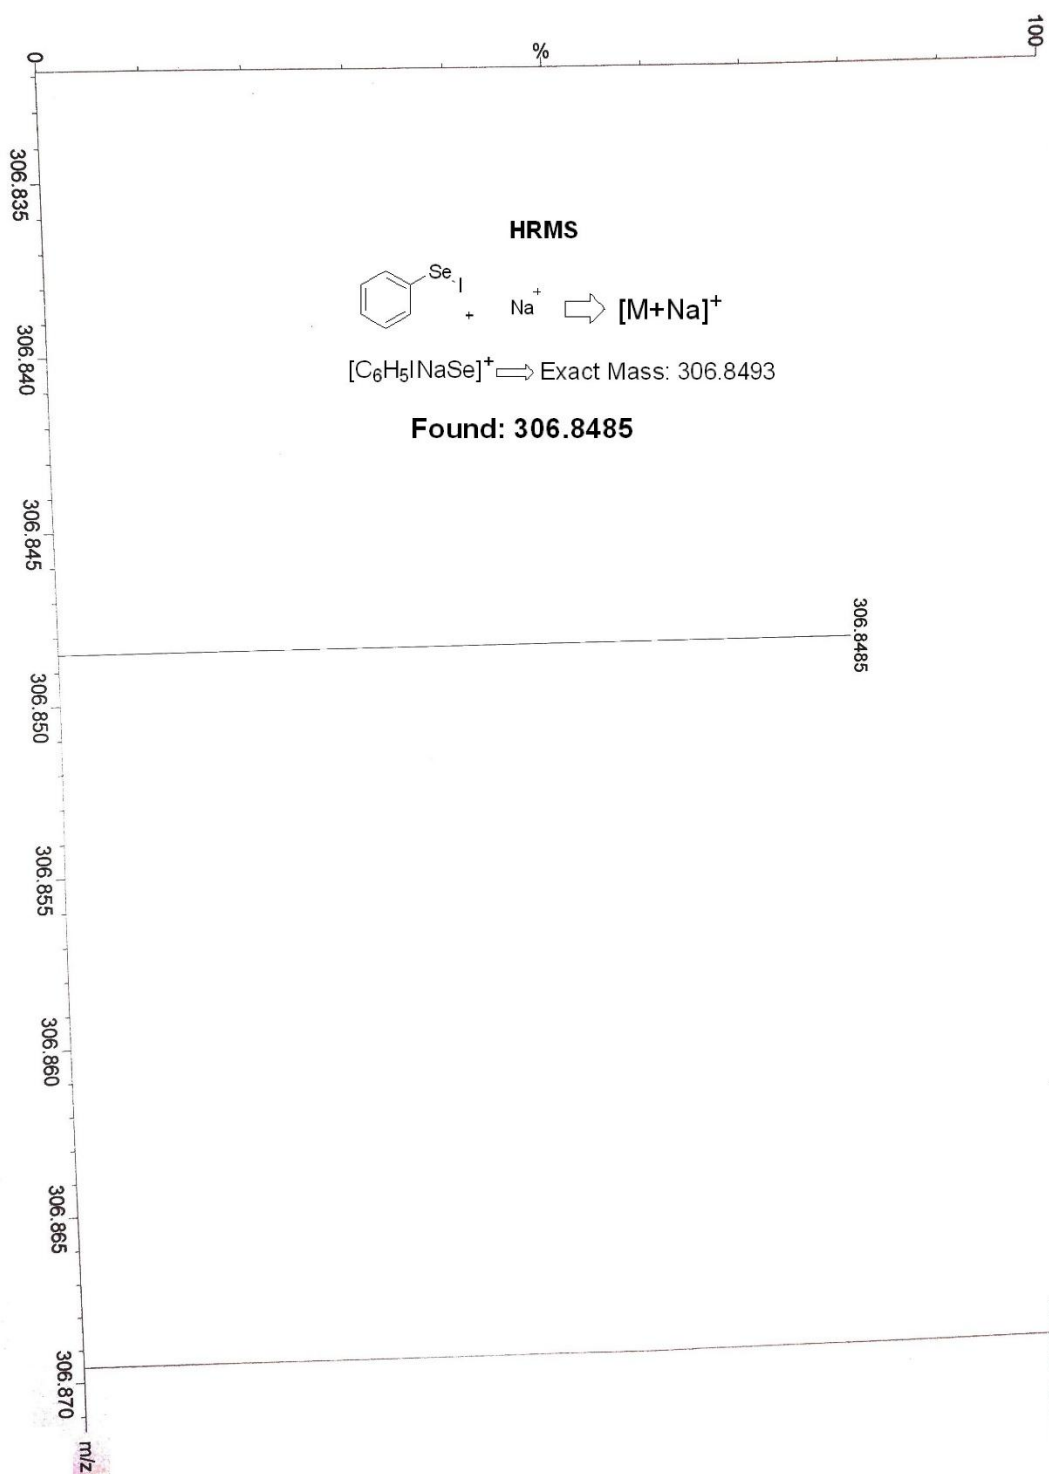

Supplement: d6ob00362a1.pdf [file d6ob00362a1.pdf]
